1  
2  
3  
4  
5  
6  
7  
8  
9  
10  
11  
12  
13  
14  
15  
16  
17  
18

**Effects of exposure to sublethal concentrations of  
methoxyfenozide on honey bee colony activity and  
thermoregulation**

**William G. Meikle, Vanessa Corby-Harris, Mark J. Carroll, Milagra Weiss,  
Lucy A. Snyder, Charlotte A.D. Meador, Eli Beren, and Nicholas Brown**

Carl Hayden Bee Research Center, USDA-ARS, Tucson, AZ, USA

## 19 **Abstract**

20 Methoxyfenozide is an insect growth regulator (IGR) commonly used in agricultural to simultaneously  
21 control pests and preserve beneficial insect populations; however, its impact on honey bees is not fully  
22 understood. We conducted field and laboratory experiments to investigate bee health in response to field-  
23 relevant doses of this pesticide. Significant effects were observed in honey bee colony flight activity and  
24 thermoregulation after being treated with methoxyfenozide. Data collected indicated that hives fed 500  
25 ppb methoxyfenozide treated pollen patty had: 1) a significantly reduced rate of daily hive weight loss  
26 due to forager departure at the start of the colony's daily activity; 2) the end of the colony's daily activity  
27 delayed by 17-21 minutes compared to Control; and 3) higher temperature variability during the winter.  
28 Colonies in the 125 ppb treatment group had fewer differences with the Control group, but did show a  
29 delay in the foraging end time by 30-46 minutes compared to the Control. Bee colony metrics of adult bee  
30 mass and brood surface area, and individual bee measurements of head weight, newly-emerged bee  
31 weight, and hypopharyngeal gland size were not significantly affected by the methoxyfenozide exposure  
32 levels of our experiments. An experiment conducted using the same treatment groups in the spring  
33 resulted in fewer differences among groups than did the experiments conducted in the fall. Analyses of  
34 methoxyfenozide concentrations in the treatment patty, wax, and bee bread showed that: 1) observed  
35 methoxyfenozide concentrations were about 18-60% lower than the calculated concentrations; 2) no  
36 residues were observed in wax in any treatment; and 3) methoxyfenozide was detected in stored bee bread  
37 in the 500 ppb treatment, at concentrations about 1-2.5% of the observed concentration for that treatment.  
38 These results suggest that there may be significant effects on honey bee colony behavior (and possibly  
39 health) in the field that are difficult to detect through traditional hive inspections and individual metrics.

40

41 **Key words:** insect growth regulator, continuous hive monitoring, bee colony behavior, pollen patty,  
42 pesticide concentration

43

44

## 45 **Introduction**

46 Honey bee colonies are frequently exposed to agrochemicals, including many different classes of  
47 insecticides, among them insect growth regulators (IGRs) [1]. Broadly speaking, IGRs interfere with  
48 insect growth and development in their target pest species [2]. The IGR methoxyfenozide is an ecdysone  
49 receptor agonist that binds the ecdysteroid receptor and activates the ecdysteroid signaling pathway [3, 4].  
50 Unlike the ecdysteroid hormone that precisely controls larval development by binding to the receptor for  
51 a defined period of time, ecdysteroid agonists bind irreversibly, disrupting the expression of genes  
52 involved in cuticle development, sclerotization, and ecdysis [4, 5]. Methoxyfenozide specifically targets  
53 lepidopterans and research shows that it has high affinity for the lepidopteran ecdysteroid receptor that is  
54 not seen in other insect orders (reviewed in [3, 4]). Although the binding specificity of methoxyfenozide  
55 to the *Apis mellifera* ecdysteroid receptor has not been determined, it is safe to assume that it should not  
56 bind. Fewer non-target effects makes methoxyfenozide an attractive, targeted solution for controlling  
57 pests while preserving beneficial insect populations. Methoxyfenozide is registered in more than 50  
58 countries for use in a variety of crops, including those pollinated by honey bees. Methoxyfenozide use has  
59 increased 15-fold between 2001 and 2015, from ~30,000 to ~450,000 pounds annually [6], mostly in  
60 orchards, to control lepidopteran pests like the navel orangeworm, *Amyelois transitella* (Walker) [7].

61 Reported toxicity of methoxyfenozide to young worker bees is low, with an acute toxicity LD<sub>50</sub>  
62 greater than 100 ug/bee [8] and, when formulated with spinetoram, an oral toxicity LC<sub>50</sub> of about 712  
63 mg/L (ppm) in young workers [9]. Nevertheless growers have been advised to avoid spraying during  
64 bloom because the impact of methoxyfenozide on earlier life stages, older workers, or on colonies is not  
65 fully understood [10]. Despite these spray recommendations, methoxyfenozide has been detected in  
66 commercial colonies in bees (9-21 ppb) and hive materials including wax (80-495 ppb), pollen (35-128  
67 ppb), and honey (3 ppb) [1, 11]. In a recent study, methoxyfenozide has been shown to decrease forager  
68 survival at field-relevant doses [12].

69           Other IGRs have caused delayed sublethal effects in adult honey bees after larval exposure.  
70   Larval bees exposed to the juvenile hormone analog pyriproxyfen in pollen patty at 321 ppb showed  
71   increased deformities as adults, reduced adult survivorship and exposed adults had difficulties integrating  
72   into the general adult population; fewer effects were observed at the lower concentration of 129 ppb [13].  
73   The impact of methoxyfenozide on honey bee colonies is not fully understood. Although  
74   methoxyfenozide is marketed as a safe pesticide due to its specificity to certain pests, it is nonetheless  
75   possible that honey bees are negatively impacted simply due to the energetic cost of detoxifying an  
76   exogenous chemical [14-16]. Pesticide exposure can lead to increased expression of stress response and  
77   detoxification genes [17], but expression patterns vary [18]. It is unclear whether detoxification, *per se*, is  
78   stressful to honey bees, although metabolomic analyses of bees exposed to plant secondary toxins suggest  
79   that it is [14] and nurse-aged bees exposed to some classes of pesticides have reduced hypopharyngeal  
80   glands [18, 19], a pattern observed with other stressors [20].

81           Effects that are difficult to detect on the level of the individual may be detected on the level of the  
82   colony [21]. Continuously monitoring weight and internal hive temperature of honey bee hives has  
83   provided information on bee colony growth and activity [22-24]. In those studies, continuous weight and  
84   hive temperature data were detrended by subtracting the 25-hour running average from the raw data.  
85   Running average weight data provided information on longer-term colony growth while the detrended  
86   within-day data were modeled using sine curves to yield information on foraging activity and success.  
87   Similarly, the average and detrended hive temperature data were related to capped brood levels [22].  
88   These approaches were used to detect colony-level treatment effects of sublethal exposure of the  
89   neonicotinoid pesticide imidacloprid on flight activity and internal hive temperature control (colony  
90   thermoregulation) [25]. In another approach, continuous hive weight data were detrended by subtracting  
91   the value at midnight, rather than the running average, from each of the values of that day until the next  
92   midnight [26]. In that approach, a piecewise regression model was fitted to single-day datasets in the  
93   original time scale using an R function [27] based on a bootstrapping method [28]. Several parameters of

94 the piecewise regression provide biological or behavioral interpretations, such as break points around  
95 dawn and dusk reflecting the beginning and ending of the daily active periods for the hive [26].

96 To more fully address the possible consequences of methoxyfenozide exposure on honey bees,  
97 we conducted replicated field and laboratory investigations of bee health in response to field-relevant  
98 doses of this pesticide. In two different years, we mixed methoxyfenozide into pollen patty and fed it to  
99 colonies. Colony parameters such as brood area, adult weight, foraging activity, and hive temperature  
100 were measured. We find that methoxyfenozide does not exert a massively negative effect on honey bees,  
101 but that small differences among hives in foraging activity and hive temperature regulation appear to be  
102 exacerbated in the high-dose treatments compared to the control.

103

## 104 **Materials and methods**

### 105 **1. Preparation of pollen supplement**

106 A 50 mg/ml stock solution of methoxyfenozide was prepared in acetone. 18 kg of pollen patty supplement  
107 was prepared in 1.5 kg batches in a stand mixer at a ratio of 1:1:1 corbicular pollen (Great Lakes Bee  
108 Co.):granulated sugar:drivert sugar (Domino Foods). For the 500 ppb treatment, 15  $\mu$ L of the stock  
109 solution of methoxyfenozide was added to 235  $\mu$ L of acetone yielding a 3 mg/ml solution. 250  $\mu$ L of this  
110 3 mg/ml solution was added to 130 ml of water and then thoroughly mixed with 1.5 kg of patty.

111 Similarly, the 125 ppb treatment patty was prepared by adding 3.75 ul of the stock solution to 246.25 ul  
112 acetone yielding a 0.75 mg/ml solution. 250  $\mu$ L of this 0.75 mg/ml solution was added to 130 mL water  
113 and thoroughly mixed into 1.5 kg of patty. All of the diet was prepared at the same time for the Fall 2016  
114 experiment. The diet was divided into 100 g patties and stored at -20°C until the supplement was fed.

115 Pollen supplement for Fall 2017 and Spring 2018 experiments was prepared in a similar manner  
116 except that the methoxyfenozide stock solution was prepared to 6 mg/ml in acetone. 125  $\mu$ L of that  
117 solution was then mixed with 100 mL water for a concentration of 0.75 mg/100 mL and applied to 1.5 kg  
118 supplement for a concentration of 500 ppb. Likewise, 31  $\mu$ L of stock solution was diluted with 93  $\mu$ L

119 acetone and mixed with 100 mL water per 1.5 kg diet for a concentration of 125 ppb. Control patties were  
120 treated with 125  $\mu$ L pure acetone and 100 mL water. Patties were divided and stored in the same manner.  
121 Patty samples (3 g) were submitted to the Laboratory Approval and Testing Division, Agricultural  
122 Marketing Service, USDA (LATD), Gastonia, NC, to determine methoxyfenozide concentrations.

123

## 124 **2. Fall 2016 field experiment.**

125 In August 2016, eighteen honey bee colonies were selected from apiaries at or near the Carl Hayden Bee  
126 Research Laboratory, USDA-ARS, Tucson, AZ (32°16'30.17"N, 110°56'28.52"W) and the Santa Rita  
127 Experimental Range (SRER) (31°46'38.08"N, 110°51'47.39"W) and moved to a single site at SRER in  
128 August, 2016. Colonies had been stocked with Cordovan-Italian queens (C.F. Koehnen & Sons, Glenn,  
129 CA) and housed in painted, 10-frame wooden Langstroth deep boxes fitted with migratory wooden lids  
130 (Mann Lake Ltd, Hackensack, MN). Colonies were 6-18 months old at the start of the experiment. The  
131 SRER apiary was provided with a permanent water source and hives were spaced 1-3 m apart. Hives were  
132 placed on stainless steel electronic scales (TEKFA® model B-2418 and Avery Weigh-Tronix model  
133 BSAO1824-200) (max. capacity 100 kg) connected to 12-bit dataloggers (Hobo® U-12, Onset Computer  
134 Corporation) that were set to record weight every 5 minutes. The system had an overall precision of  
135 approximately  $\pm 20$  g. On the same day, a hive temperature sensor (iButton Thermochron, precision  $\pm 0.06$   
136 °C) enclosed in plastic tissue embedding cassettes (Thermo Fisher Scientific, Waltham, MA) was stapled  
137 to the center of the top bar on the 5th frame in each hive and set to record every 30 min.

138 On 29-30 August, 2016, hives were given a full pre-treatment assessment (see [24, 29]). Briefly,  
139 the hive was opened after the application of smoke, and each frame was lifted out, gently shaken to  
140 dislodge adult bees, photographed using a 16.3 megapixel digital camera (Canon Rebel SL1, Canon USA,  
141 Inc., Melville, NY), weighed on a portable scale (model EC15, Ohaus, 15 kg max. cap.), and replaced in  
142 the hive. Frames were removed and replaced sequentially. During this first assessment (but not  
143 subsequent assessments), all hive components (i.e. lid, inner cover, box, bottom board, frames, entrance

144 reducer, internal feeder) were also shaken free of bees and weighed to yield an initial mass of all hive  
145 components. At the initial inspection, 3-5 g of wax were collected from each hive into 50 ml centrifuge  
146 tubes and stored at -80°C; samples collected in September, prior to treatment, were pooled and subjected  
147 to a full panel analysis for residues of 192 pesticides and fungicides, from all major classes, by LATD.  
148 Samples from later assessments were pooled within treatment group and subjected only to  
149 methoxyfenozide residue analysis.

150         The total weight of the adult bee population (whole colony adult bee mass) was calculated by  
151 subtracting the combined weights of hive components obtained in the pre-treatment assessment from the  
152 total weight of bees and hive materials recorded the midnight prior to the inspection. The area of sealed  
153 brood per frame was estimated from the photographs using ImageJ version 1.47 software (W. Rasband,  
154 National Institutes of Health, USA). The 18 colonies were randomly assigned to three treatment groups,  
155 to be given the Low (125 ppb), High (500 ppb) and Control treatments. Care was taken to ensure the  
156 average adult bee mass per treatment group varied by no more than 100 g among all treatments to  
157 minimize pre-existing differences (Table 1). Each hive was given 100g pollen patty twice a week with the  
158 appropriate concentration starting on 2 September, continuing weekly for 9 weeks until 28 October (1800  
159 g treatment pollen patty total per hive). Consumption of the patty was measured by weighing any patty  
160 (wet weight) that remained after one week. Hives were assessed on 2 November, 2016 (first post-  
161 treatment assessment, 61 d after initial treatment). Each colony was then given 3 kg of 1:1 sugar syrup  
162 and frame of capped honey on 10 November because of low food stores. Colonies were assessed and  
163 sampled for the final time on 30 January, 2017, (2<sup>nd</sup> post-treatment assessment) to determine the long-  
164 term effects of methoxyfenozide exposure on overwintering.

165

### 166 **3. Fall 2017 field experiment**

167         The experiment described above was repeated in 2017. In April, 2017 twenty colonies were  
168 started from packages from the same supplier as the previous year and installed in SRER at a site about 2

169 km away from the Fall 2016 site. Colonies were in single deep hive boxes and maintained with new  
170 Cordovan-Italian queens from the same queen supplier as the first year. Colonies were fed supplemental  
171 pollen patty in the spring, and 12 kg 1:1 sugar syrup between May and early September. On 13 September  
172 2017, full pre-treatment hive assessments were conducted on all colonies. Second deep boxes were added  
173 to 6 of the colonies because of their size. Colonies were divided into 3 groups with similar adult bee  
174 masses (<100 g difference), and each colony was given 100 g treatment pollen patty twice per week  
175 beginning on 22 September and continuing for 8 weeks until 9 November (48 d after initial treatment,  
176 1600 g treatment pollen patty total). Three supplemental feedings of 3 kg of 1:1 sugar syrup were  
177 provided to each colony during the treatment period. The 1<sup>st</sup> post-treatment hive assessments were  
178 conducted on 15 November. Smaller colonies were reduced to single boxes for overwintering on 16  
179 November 2017. The 2<sup>nd</sup> post-treatment hive assessments were conducted on 13 February 2018. From 1  
180 to 2 g of bee bread was collected from each hive at each assessment. As with the wax samples for the Fall  
181 2016 experiment, samples collected in September, prior to treatment, were pooled and subjected to a full  
182 panel of residue analyses while samples from later assessments were pooled within treatment group and  
183 subjected only to methoxyfenozide residue analysis. Samples of protein patty from each treatment were  
184 also analyzed for methoxyfenozide concentration. In addition, newly-emerged bees (NEBs) were also  
185 sampled by pressing an 8 cm x 8 cm x 2 cm mesh queen cage into a section of capped brood, then  
186 returning the following day to collect NEBs that had emerged within the cage over the previous 24 h. The  
187 NEBs were then placed in a 50 mL centrifuge tube, frozen on dry ice, and stored at -80°C. At the  
188 laboratory, 5 bees per hive per assessment date were placed in Eppendorf tubes, weighed, dried for 72 h at  
189 60°C, then re-weighed to determine average wet and dry weight per bee.

190

#### 191 **4. Spring 2018 field experiment**

192 The hives used in the Fall 2017 experiment were retained in the same treatment groups and  
193 treated in the same manner as in the previous fall, using pollen patties with the same concentrations of



194 methoxyfenozide. Treatments consisting of 100 g pollen patty were started on 8 March and continued  
195 twice weekly for 6 weeks until 13 April (42 d after initial treatment, 1200 g treatment pollen patty total).  
196 All hives were given 4 L supplemental sugar syrup on 30 March. Hives were evaluated on 18 April (1<sup>st</sup>  
197 post-treatment assessment) and again on 24 May (2<sup>nd</sup> post-treatment assessment). Bee bread and NEBs  
198 were sampled at each assessment.

199

## 200 **5. Adult bee head weights from Fall 2017 experiment**

201 Head weight was measured on samples of nurse-aged bees collected from all colonies after the  
202 November 2017 post-treatment hive evaluation. Nurse-aged bees visiting cells containing larvae for a  
203 period of  $\geq 5$  seconds were collected. The captured bees were immediately flash frozen in the field and  
204 were maintained at  $-80^{\circ}\text{C}$  until their heads were weighed. To obtain head weights, each head was thawed  
205 and weighed using a Sartorius CP2P microbalance at a resolution of 0.01 mg (see [30]).

206

## 207 **6. Hypopharyngeal gland size of nurse-aged workers fed methoxyfenozide**

208 In order to assess whether oral methoxyfenozide exposure affected nurse-aged bee health, HPG  
209 size was measured in caged nurse-aged bees fed either 1000 ppb of methoxyfenozide in 30% sugar syrup  
210 or a control dose of methoxyfenozide-free sugar syrup. A comparatively high dose was chosen to increase  
211 the probability of a measurable effect. NEBs emerged overnight from brood frames taken from three  
212 colonies in a temperature-controlled dark room ( $32\text{--}34^{\circ}\text{C}$ , 30–40% relative humidity). The next morning,  
213 the NEBs were distributed among eight cages to a density of 100 bees per cage. Cage dimensions were  
214 11.5 x 7.5 x 16.5 cm, with narrow sides, top and base made of Plexiglas® and the broad sides and floor  
215 made of 3mm aperture galvanized steel mesh. A plastic 50 mL bottle for distilled water and a plastic  
216 30mL bottle for syrup, each with a small hole in the lid, were inverted and placed over holes on the top of  
217 each cage. Four cages were provided with 1000 ppb methoxyfenozide in 30% sucrose syrup and four  
218 cages with 30% sucrose syrup without the pesticide as controls. All cages were provided with pollen

219 patty, 1:1:1 sucrose : drivert sugar : natural pollen (Great Lakes Pollen, Bulkfoods.com) *ad libitum*. The  
220 caged bees were maintained at 34°C and 30–40% relative humidity. At 8d after emergence, 10 bees per  
221 cage were flash frozen and maintained at -80°C until their HPGs were dissected and measured (see [31]).  
222 Between 10 and 12 HPG acini were measured for each gland to obtain an average HPG acinus size for  
223 each bee.

224

## 225 **7. Data analysis: Hive assessment, patty consumption, NEB weights, nurse bee** 226 **head weights and HPG size**

227 Adult bee masses, capped brood surface areas and NEB dry weights were compared among  
228 treatments across sampling occasions using repeated-measures MANOVA (SAS version 9.4) with  
229 treatment, experiment and day as main factors, all 2-way interactions, and with pre-treatment adult bee  
230 mass as a covariate to control for pre-existing colony differences. Per colony patty consumption and nurse  
231 bee head weights were analyzed using ANOVA, in which treatment was the main effect and hive was a  
232 random effect. Caged-bee data were analyzed using ANOVA, with treatment as a fixed effect and cage  
233 replicate as a random effect. Post hoc contrasts with the Bonferroni correction for multiple comparisons  
234 were reported for significant treatment effects.

235

## 236 **8. Data analysis: Hive weight**

237 Continuous hive weight data were considered with respect to average daily weight and within-day  
238 changes. Weight data were detrended for each day by subtracting the hive weight estimate at midnight (or  
239 closest time thereafter) from each subsequent weight value over the next 24 h (see [25]). The resulting  
240 within-day weight datasets were modeled using the “segmented” function in R which fits a segmented  
241 line derived from a linear or generalized linear model to a dependent variable using a bootstrapping  
242 procedure [27]. Bee colonies outside of a nectar flow during winter tend to lose weight and exhibit  
243 consistent daily patterns (Fig 1). Piecewise regressions with 4 breakpoints were fit to the data, which

244 yielded estimates for 10 parameters: 4 break point values, 5 slope values and the adjusted  $r^2$ . Because the  
245 data were detrended by subtracting the raw data value at midnight, daily datasets were mathematically  
246 independent. A repeated measures MANOVA was conducted on these daily parameter values of interest  
247 (letters refer to Fig. 1):

- 248 1. Beginning of initial forager departure (usually the 1<sup>st</sup> break point, Point B);
- 249 2. End of initial forager departure (usually 2<sup>nd</sup> break point, Point C);
- 250 3. Time of final forager return (usually the 4<sup>th</sup> break point, Point E);
- 251 4. Average slopes of the 1st and 5th segments, which are weight changes at night when colonies are  
252 not foraging (Segments AB and EF);
- 253 5. Slope of the first segment after initial forager departure, usually the 2nd segment (usually  
254 Segment BC); and
- 255 6. Slope of the last segment before dusk, usually the 4th segment (usually Segment DE).

256 For statistical analysis, if the 1st break point occurred before 4AM, the 2nd break point was used as the  
257 time of initial forager departure (with no restrictions placed on that second estimate) and the slope of the  
258 3rd, rather than 2nd, segment was used as the rate of weight loss due to forager departure. Likewise, if the  
259 4th break point occurred after 8PM then the 3rd break point was taken as the time of final forager return  
260 (with no restrictions placed on that second estimate). For all analyses involving slopes, the pre-treatment  
261 adult bee mass was included as a covariate to control for pre-existing differences in forager populations.

262

263 **Figure 1.** Graph showing data and fitted piecewise regression to data from a single hive in the Control  
264 group for a single day (24 November 2017) during a nectar and pollen dearth.

- 265 1. **Point A:** First weight measure at midnight or shortly thereafter;
- 266 2. **Segment AB:** Inactive period in the early morning; hive weight change is likely due to bee  
267 respiration and changes in the moisture content of nectar, pollen and wooden hive parts;
- 268 3. **Point B:** Bee departure at beginning of active period (usually close to dawn);

- 269 4. **Segment BC:** Active period usually showing hive weight loss due to far greater numbers of  
270 departing bees compared to returning bees;
- 271 5. **Point C:** Point at which mass of returning bees increases relative to mass of departing bees;
- 272 6. **Segment CD:** Continued increased return of foragers;
- 273 7. **Point D:** Point at which mass of returning foragers, including nectar and pollen as well as bee  
274 weight loss due to respiration, exceeds the mass of departing bees plus weight loss due to drying  
275 and respiration in the colony;
- 276 8. **Segment DE:** Inactive period with hive weight change driven mainly by respiration and changes  
277 in ambient humidity – usually close to parallel with segment AB;
- 278 9. **Point E:** Return of bees to the hive around dusk is completed;
- 279 10. **Segment EF:** Inactive period in the late evening; similar dynamics with moisture content of hive,  
280 bee respiration and ambient humidity;
- 281 11. **Point F:** Last weight measure just before midnight.

282

## 283 **9. Data analysis: Hive temperature**

284 Internal hive temperature data were divided into daily average values and within-day detrended  
285 data. Detrended data were calculated as the difference between the 25 hour running average and the raw  
286 data [24]. Sine curves were fit to 3-day subsamples of detrended data taken sequentially by day, and curve  
287 amplitudes, representing estimates of daily hive temperature variability, were used as response variables.  
288 For hives with two boxes, only temperature data from the lower (brood) box were analyzed. Repeated  
289 measures MANOVA (Proc Glimmix, SAS Inc. 2002) was used to evaluate the effects of treatment, day,  
290 and their interaction, with the pre-treatment whole colony adult bee mass as a covariate on both the  
291 average daily hive temperature and the amplitudes of the fit sine curves. Temperature amplitude datasets  
292 were reduced to one value per hive point every 3 d for repeated measures analysis to ensure no overlap  
293 between subsamples.

294

## 295 **Results**

### 296 **1. Hive assessment**

297           Methoxyfenozide treatment did not have a measurable impact on either whole colony adult bee  
298 mass ( $P=0.73$ ) or brood surface area ( $P=0.43$ ) in the Fall 2016 or Fall 2017 experiments , nor were the  
299 two experiments different from each other with respect to these metrics ( $P=0.36$  and  $P=0.26$ , respectively)  
300 (Table 1). Considered separately, neither adult bee mass nor brood surface area in the Spring 2018  
301 experiment was affected by treatment ( $P=0.14$  and  $P=0.37$ , respectively). During the Spring 2018  
302 experiment, two colonies in the 125 ppb treatment group and one colony in the 500 ppb treatment group  
303 died, in all cases around 1 May. Pre-treatment adult bee mass was significantly correlated with adult bee  
304 mass at the 2<sup>nd</sup> post treatment assessment for the Fall 2016, Fall 2017 and Spring 2018 field experiments  
305 (adjusted  $r^2= 0.27, 0.44$  and  $0.31$ , respectively). Two colonies in the 500 ppb treatment group and one in  
306 the 125 ppb treatment group died in the Fall 2016 experiment, and one colony in the 500 ppb treatment  
307 group and two in the 125 ppb treatment group died in the Spring 2018 experiment.

308

309

310 **Table 1.** Adult bee masses and brood surface areas for the Fall 2016, Fall 2017 and Spring 2018 field

311 experiments.

312

| Dates        | Adult bee mass (g) |           |           | Capped brood surface area (cm <sup>2</sup> ) |               |               |
|--------------|--------------------|-----------|-----------|----------------------------------------------|---------------|---------------|
|              | 125 ppb            | 500 ppb   | control   | 125 ppb                                      | 500 ppb       | control       |
| Fall 2016:   |                    |           |           |                                              |               |               |
| 30 Aug. 2016 | 2166 ±141          | 2254 ±234 | 2202 ±204 | 2120.6 ±220.7                                | 1972.4 ±436.0 | 2475.5 ±291.7 |
| 2 Nov. 2016  | 1550 ±153          | 1498 ±330 | 1633 ±139 | 583.2 ±53.1                                  | 498.0 ±134.6  | 546.6 ±97.7   |
| 1 Feb. 2017  | 782 ±224           | 777 ±296  | 1352 ±107 | 9.1 ±8.0                                     | 3.7 ±0.6      | 11.6 ±7.9     |
| Fall 2017:   |                    |           |           |                                              |               |               |
| 13 Sep. 2017 | 1641 ±251          | 1591 ±208 | 1595 ±141 | 426.4 ±112.5                                 | 630.1 ±158.3  | 756.7 ±98.3   |
| 15 Nov. 2017 | 1563 ±170          | 1496 ±224 | 1434 ±83  | 274.9 ±38.4                                  | 210.6 ±33.1   | 269.4 ±53.0   |
| 13 Feb. 2018 | 1010 ±230          | 920 ±150  | 810 ±90   | 412.8 ±96.2                                  | 320.1 ±125.4  | 496.7 ±153.6  |
| Spring 2018: |                    |           |           |                                              |               |               |
| 18 Apr. 2018 | 1211 ±422          | 1453 ±416 | 780 ±136  | 1607.2 ±413.6                                | 2613.8 ±640.1 | 1055.6 ±245.7 |
| 23 May 2018  | 1054 ±351          | 1553 ±491 | 534 ±162  | 1110.6 ±169.9                                | 1292.7 ±259.2 | 477.3 ±167.7  |

313

## 314 **2. Patty consumption**

315

Bee colonies in all groups consumed all the pollen feed in the Fall 2016 and Fall 2017

316

experiments. In the Spring 2018 experiment some colonies did not consume all 1100 g patty but average

317

values (wet weight) among treatment groups were not significantly different when average adult bee mass

318 during feeding period was used as a covariate ( $P=0.72$ ): the 500 ppb group consumed  $900\pm 97$  g, the 125  
319 ppb group consumed  $868\pm 154$  g, and the control group consumed  $871\pm 94$  g. Total consumption was  
320 related to colony size: the average adult bee mass of the colonies that consumed all the patty was  $1.61 \pm$   
321  $0.28$  kg while that for the colonies that did not was  $0.74\pm 0.08$  kg, and among colonies that did not finish  
322 the patty, consumption was directly proportional to adult bee mass ( $F_{1,10}=13.21$ ,  $P=0.0046$ , adj.  $r^2=0.53$ ).

323

### 324 **3. NEB weights and nurse bee head weights**

325 Dry weights of NEBs were not significantly different among treatments in the Fall 2017  
326 experiment ( $P=0.45$ ). Methoxyfenozide application did not influence head weight of bees collected in the  
327 Fall 2017 experiment. Average head weights ( $\pm$ s.e.) for bees in hives treated with the 500 ppb  
328 ( $12.51\pm 0.37$  mg), 125 ppb ( $12.29\pm 0.31$  mg) and control ( $12.32\pm 0.19$  mg) treatments did not differ  
329 significantly ( $P=1.0$ ).

330

### 331 **4. HPG size of caged bees**

332 Oral exposure to methoxyfenozide during young adult development did not impact the  
333 hypopharyngeal gland sizes of nurse-aged workers ( $P=0.31$ ). The average ( $\pm$ s.e.) acinus size of bees  
334 exposed to 1000 ppb methoxyfenozide in syrup was  $0.021\pm 0.007$  mm<sup>2</sup>, while those fed the control  
335 treatment had glands that were  $0.025\pm 0.007$  mm<sup>2</sup>.

336

### 337 **5. Pesticide analyses**

338 Wax samples taken during the Fall 2016 experiment were analyzed for methoxyfenozide residues  
339 and none were found (Limit of Detection [LOD]=1 ppb) with the exception of trace amounts detected in  
340 the 500 ppb treatment in early November, just after the end of the treatment period. For the Fall 2017  
341 experiment, bee bread samples were analyzed rather than wax. In the initial sample, analyzed with respect  
342 to a full panel of 192 compounds, only trace amounts of diphenylamine (LOD=2 ppb) and 118 ppb of

343 thymol were detected. No methoxyfenozide was detected in the bee bread except for samples collected  
344 from hives in the 500 ppb treatment in the November, February and April hive assessments. Those  
345 samples contained 5, 2 and 2 ppb methoxyfenozide, respectively. The protein patty samples for the 500  
346 ppb, 125 ppb and control treatments were found to have 199, 103 and 0 ppb methoxyfenozide,  
347 respectively.

348

## 349 **6. Hive weight for Fall 2016 and Fall 2017 experiments**

350 Piecewise regression curves fit the data well on average: average ( $\pm$ s.e.) adj.  $r^2$  values for the 125  
351 ppb, 500 ppb and Control groups were  $0.94 \pm 0.03$ ,  $0.92 \pm 0.05$  and  $0.91 \pm 0.05$ , respectively, for the Fall  
352 2016 experiment and  $0.96 \pm 0.02$ ,  $0.93 \pm 0.04$  and  $0.94 \pm 0.03$ , respectively, for the Fall 2017 experiment.  
353 Dusk break point was significantly affected by treatment (Fig 2). Post hoc contrasts showed that all  
354 treatment groups were significantly different from each other. Lower values in the Control group indicate  
355 that the dusk break point occurred significantly earlier in the day than for either of the other treatment  
356 groups, and earlier for the 500 ppb group than for the 125 ppb group. The two fall field experiments were  
357 themselves significantly different with respect to dusk break point. In the Fall 2016 experiment, the  
358 Control treatment group average dusk break point was about 4:37 PM, with the 500 ppb treatment group  
359 21 minutes later and the 125 ppb treatment group 30 minutes later than Control. In the Fall 2017  
360 experiment, the Control treatment group average dusk break point was about 4:59 PM, with the 500 ppb  
361 treatment group 17 minutes later and the 125 treatment group 46 minutes later than Control.

362

363 **Figure 2.** Break points associated with the end of the daily active period (dusk) for piecewise regression  
364 curves on within-day hive weight changes for the Fall 2017 experiment. Dashed black vertical line shows  
365 the end of the treatment period. Solid black horizontal line shows calculated sunset time.

366



367 Slopes of the segments associated with forager departure after the dawn break point were  
368 significantly affected by treatment (Fig 3, S1 Table). Post hoc contrasts showed that slopes in the 500 ppb  
369 treatment were significantly shallower (lower in absolute value) than those in the Control treatment  
370 ( $P=0.0043$ ), indicating a lower rate of forager departure. Neither the night segment slopes nor the dawn  
371 break point were significantly affected by treatment ( $P=0.51$  and  $0.34$ , respectively).

372

373 **Figure 3.** Segment slopes associated with departing foragers for the Fall 2017 experiment. Dashed black  
374 vertical line shows the end of the treatment period. Solid gray horizon line shows slope=0.

375

376 Average piecewise regression curves were calculated for each treatment group by averaging slope  
377 and break point values across all hives and sample days (Fig 4). Because the post-treatment data were  
378 collected in the late fall and winter, with few foraging opportunities, all hives lost weight as the bees  
379 consumed food stores. Average slopes at night tended to be positive, probably due to higher ambient  
380 relative humidity (the woodenware of the hives can gain weight, as well as any open food cells within the  
381 hive). In both years, average curves for the 500 ppb treatment group were shallower than the control,  
382 probably indicating a lower foraging effort.

383

384 **Figure 4.** Piecewise regression curves calculated using average slope and break point values calculated  
385 from all colonies within each treatment group and across all days from the end of treatment until the final  
386 hive assessment. A) Fall 2016 experiment; B) Fall 2017 experiment. Graphs have the same scales.

387

388

389 **Table 2.** Results of post hoc comparisons for three response variables with significant treatment effects  
390 for three field experiments on the effects of sublethal methoxyfenozide exposure to honey bee colonies  
391 conducted in southern Arizona.

392

| Year        | Concentration | Response variables  |                     |                          |
|-------------|---------------|---------------------|---------------------|--------------------------|
|             |               | Dusk break<br>point | Departing<br>slopes | Temperature<br>amplitude |
| Fall 2016   | 500 ppb       | <b>a</b>            | <b>a</b>            | <b>a</b>                 |
| &           | 125 ppb       | <b>b</b>            | ab                  | ab                       |
| Fall 2017   | 0 ppb         | c                   | b                   | b                        |
| Spring 2018 | 500 ppb       | -                   | <b>a</b>            | -                        |
|             | 125 ppb       | -                   | ab                  | -                        |
|             | 0 ppb         | -                   | b                   | -                        |

393 Treatment groups within the same time period with no letters in common are significantly different at  
394  $\alpha=0.05$  with a Bonferroni comparison for multiple groups. Bold indicates which group or groups had the  
395 highest value within each time period and response variable group. Dashes indicate no significant main  
396 effect.

397

## 398 **7. Hive weight for Spring 2018 experiment**

399 Hive weight consistently decreased during the fall experiments, but average hive weight in all  
400 treatment groups increased every day from the end of treatment on 20 April until 6 May. On 7 May  
401 average hive in each treatment group started to decrease, indicating the end of a nectar flow, and most

402 hives lost weight after that day until the end of the experiment on 23 May. Within-day hive weight  
403 patterns differ depending on whether there is a nectar flow [25] so those two periods (20 April-6 May and  
404 7-23 May) were considered separately. During the nectar flow, only the departing slopes were  
405 significantly different among treatments (S2 Table, Table 2). Average slope in the 500 ppb treatment  
406 group was significantly higher than the slopes for either of the other treatment groups. In this case, while  
407 average  $r^2 \pm s.e.$  values for model fit were high:  $0.96 \pm 0.03$ ,  $0.97 \pm 0.03$ , and  $0.91 \pm 0.06$  for the 125 ppb, 500  
408 ppb, and Control treatment groups, respectively, visual inspection of the data showed that breakpoints  
409 near dawn were not being detected by the algorithm, causing inaccuracies in other segment parameters  
410 such as slope values. Increasing the number of break points from 4 to 5 did not change the overall  
411 goodness of fit (average  $r^2 = 0.92$ ,  $0.97$  and  $0.96$ , respectively) and likewise did not improve detection of  
412 the break points (Fig. 5). These results, therefore, should be subject to future verification. No parameters  
413 were significantly affected by treatment during the 16 d after the end of the nectar flow.

414

415 **Figure 5.** Example of an unsatisfactory curve fit. Raw data, collected on 29 April 2018 from a hive in the  
416 500 ppb treatment group, shown with two piecewise regression curve fits: a curve with 4 break points and  
417 a curve with 5 break points. Arrow indicates expected “dawn” (1<sup>st</sup>) break point. Note that the 2<sup>nd</sup> segment,  
418 typically associated with forager departure and therefore negative, is in this case positive.

419

## 420 **8. Hive temperature for Fall 2016 and Fall 2017 experiments**

421 Internal hive temperature was considered with respect to two response variables: 1) average daily  
422 temperature; and 2) average temperature variability measured as amplitudes of curves fit to 3-day  
423 datasets. Hive temperature has been positively correlated with total adult bee mass, so pre-treatment total  
424 adult bee mass was included as a covariate in all analyses. No significant treatment effects were observed  
425 either with respect to average temperature or to temperature amplitudes when all post treatment data  
426 (from end of treatment until final hive assessment), but the low P values (0.06 and 0.07, respectively)

427 suggested there may be trends to explore by sharpening the focus of the analysis. Given that hive  
428 temperature is a function of both the bee colony and external ambient conditions, treatment effects may  
429 be more likely to be observed when a colony is challenged to manage its temperature. At the beginning of  
430 November in both 2016 and 2017 average ambient daily temperatures at the study site were about 21.7 to  
431 22.8°C. Thirty days later, however, average ambient daily temperatures had dropped to 9.4-12.8°C. Thus,  
432 ambient temperatures 30 d after the end of treatment were considered more challenging to the bee  
433 colonies and thus more likely to show an effect. Considering only the data from 30 d after the end of  
434 treatment until the final hive assessment, treatment effects on average temperature remained not  
435 significant ( $P=0.06$ ) but significant treatment effects were observed with respect to temperature  
436 amplitudes (variability) (S3 Table, Table 2, Fig 6). Temperature amplitudes were lower in the Control  
437 treatment group (about 1.72°C lower in the Fall 2016 experiment and 2.40°C in the Fall 2017 experiment)  
438 than the 500 ppb treatment group (about 2.55°C in the Fall 2016 experiment and 3.64°C in the Fall 2017  
439 experiment). Neither the Control group nor the 500 ppb group was different from the 125 ppb group in  
440 either experiment.

441

442 **Figure 6.** Internal hive temperatures. A) Average temperature for the Fall 2017 experiment; B) Average  
443 amplitudes of sine curves fit to internal hive temperature data (temperature variability). Gray zones in A)  
444 show the periods during which experimental treatments were applied.

445

## 446 **9. Hive temperature data for Spring 2018 experiment**

447 Neither average internal hive temperatures nor their daily variability were different among  
448 treatments ( $P=0.22$  and  $0.32$ , respectively) when the February adult bee mass was used as a covariate.  
449 February adult bee mass was significantly correlated with both temperature variables.

450

## 451 **Discussion**

452 Methoxyfenozide is preferred as a pesticide for many crops pollinated by honey bees. One  
453 important question regarding sublethal exposure of methoxyfenozide is how the treatment effects  
454 manifest themselves, such as by reducing brood production or adult bee survivorship, changing colony  
455 behavior, or affecting the growth or physiology of individual bees. Methoxyfenozide, with a reported  
456 acute oral toxicity of more than 5.0 g per kg for humans, is considered mildly toxic for many vertebrates  
457 and crustaceans; with respect to honey bees, it has been reported as “moderately toxic” [9] and “relatively  
458 nontoxic” [32]. Most studies on sublethal pesticide exposure rely on invasive hive assessments to estimate  
459 adult bee and brood populations. To avoid antagonizing the bees or losing the queen, these inspections are  
460 typically carried out about every 4-6 weeks, as was done here. No effects of methoxyfenozide were  
461 observed with respect to hive assessment data (total adult bee mass or brood surface area) in this study.  
462 These data are important, but they provide little information on daily or hourly changes in colony-level  
463 behavior such as foraging and thermoregulation. In this study we monitored colony behavior using hive  
464 scales, to observe hourly weight changes associated with, for example, foraging activity [26], and using  
465 temperature sensors to measure thermoregulation. Both types of sensors have been successfully used to  
466 detect the effects of sublethal exposure of honey bees to a neonicotinoid, imidacloprid [24].

467 Hive weight data, after being detrended by removing the value at midnight from subsequent  
468 values for the next 24 h, have common patterns [26]. For example, from midnight until the start of the  
469 active period, usually just after dawn, bee flight activity is minimal and hive weight changes largely  
470 involve water gain or loss depending on the amount of open nectar and ambient relative humidity. After  
471 dawn, weight changes usually become sharply negative, as the daily active period for the colony begins  
472 and foragers and other bees leave the hive. Whether hives gain or lose weight during the day depends  
473 largely on factors such as the success of the foraging bees. In the late afternoon, hives tend to gain weight  
474 as flying bees return to the colony; their return is usually complete about dusk, marking the end of the  
475 active period. After that point, hive weight changes are once again largely due to the amounts of  
476 hydrophilic materials present and to internal and ambient humidity. Hive scale data revealed treatment  
477 effects with respect to the slope of the segment associated with forager departure, and the dusk break

478 point. Because these parameters resulted from the fit of single piecewise regression curves, they should  
479 not be considered entirely independent from each other but rather reflect fundamental differences in  
480 overall daily curve shape. Average curve shapes differed from year to year, showing the effects of yearly  
481 variability in temperature and rainfall, but clear differences in curve patterns were also evident within  
482 each year. Colonies fed 500 ppb methoxyfenozide in the fall in general had shallower curves, indicating  
483 lower activity than colonies in the Control group, and the 500 ppb colonies also had delays in the dusk  
484 break point of 17-21 minutes on average, consistent between the two fall experiments. Analyses of break  
485 points other than dawn, or of slopes other than the initial forager slope, were not included here because  
486 the meaning of any differences was not clear. Although the curves usually have similar shapes among  
487 colonies and over time, not all parts of the curves have a clear interpretation. This is particularly true  
488 during a forage dearth, when forage-related environmental signals are absent.

489         The Fall 2017 field experiment was continued through the following spring, in order to observe  
490 longer-term effects of methoxyfenozide exposure. The spring environment differed from that of the fall in  
491 two crucial respects: 1) rising temperatures, longer days and increasingly available forage promote colony  
492 growth rather than stasis or decrease as observed in the fall; and 2) a nectar flow was under way during  
493 the post-treatment period in the spring but not in either fall experiment. That the colonies grew rapidly in  
494 the spring in spite of reduced pollen patty consumption suggests that alternative food sources played a  
495 large role. Interestingly, few significant colony-level effects were observed in the spring. Three colonies  
496 died after the first hive assessment in the spring, one in the 500 ppb treatment and the other two in the 125  
497 ppb treatment. As in the fall, hive assessment data were not significantly different among groups.  
498 Continuous weight data segment slopes associated with departing bees were significantly affected, with  
499 the 500 ppb hives showing higher slope values (indicating fewer departing bees) than other treatment  
500 groups, but this result did not conform with visual inspection of the data, reducing our confidence in that  
501 result. Regression models with 5 breaks, rather than 4, were fit to the data but the quality of the fit was not  
502 improved and merit further analysis. While the expectation was that hives may be more sensitive to IGR

503 in the spring, IGR effects may have been diluted by the pollen and nectar flows (see [23]) or the bees,  
504 either on the individual or colony level, were more effective at detoxification.

505         Hive internal temperature has been correlated with adult bee mass and brood levels [23]. While  
506 adult bee and brood levels were not significantly affected by treatment, internal hive temperature was  
507 significantly more variable in the 500 ppb treatment group when November data were excluded (mild  
508 temperatures in November would have resulted in lower variability values in any case; removing those  
509 data put the focus on December through the final hive assessment in February). It may be that the  
510 temperature data were more sensitive to brood levels than the inspection data, if only because of the larger  
511 amount of temperature data, and as a consequence the temperature data revealed smaller differences.

512         Methoxyfenozide concentration was measured in wax samples during the Fall 2016 experiment,  
513 and none was detected in any sample. Wax was sampled to determine if the lipophilic nature of the  
514 compound facilitated its spread throughout the hive and that none was detected suggests that such  
515 spreading occurs at very small quantities, if at all. For the Fall 2017 and Spring 2018 experiments, bee  
516 bread was sampled. Low concentrations of methoxyfenozide were detected in bee bread from the 500 ppb  
517 treatment group and none in the other groups. The concentrations were apparently stable over time, from  
518 the end of the fall treatment in November until the end of the spring treatment the following April.  
519 Treatment patties were also sampled for methoxyfenozide concentration. Observed concentrations in the  
520 treatment patties were 17.6% lower than calculated concentrations in the 125 ppb treatment and 60.2%  
521 lower than calculated concentrations in the 500 ppb treatment. Disparities at about that magnitude  
522 between calculated and observed concentrations of pesticides mixed in pollen patties have been reported  
523 elsewhere [34]. Such disparities may be due to several factors, including insufficient mixing in a  
524 heterogeneous material (pollen patty), or a breakdown of the compound due to chemical reactions or  
525 biological activity in the patty environment. Using the observed concentration values, the bee bread  
526 results suggest that 1-2.5% of the bee bread sampled was treatment patty.

527         While significant effects of methoxyfenozide exposure on colony behavior were observed, no  
528 differences were detected with respect to hive assessment data (adult bee mass and brood surface area) or

529 on the level of the individual bee (gland size, NEB dry weight and head mass of nurse bees). The kinds of  
530 colony-level behaviors that were measured, i.e. foraging activity and thermoregulation, can be considered  
531 functions of either colony size and age structure, or individual adult bee behavior, or both. Greater  
532 foraging activity by one colony compared to another may result from a larger adult bee population with a  
533 similar proportion of foragers or from a similar adult bee population with a higher proportion of foragers.  
534 Reduced variability in internal hive temperatures may result from the better insulation properties of a  
535 tighter bee cluster, from more heat, on average, per bee, or simply from more bees. Although brood levels  
536 were not significantly different, the 500 ppb treatment group ranked last for each post-treatment hive  
537 assessment in both fall experiments, suggesting that thermoregulation differences were likely (but not  
538 definitively) linked to brood levels. The significance of the observed delay in the end of foraging activity  
539 (“dusk”) is not clear, but longer-term effects of sublethal pesticide exposure are not always well  
540 understood. Six of the 36 colonies involved in this study died and none was from the control group.  
541 Further work is needed to link observed changes in colony behavior to longer-term effects on colony  
542 performance and survivorship.

543

## 544 **Conclusions**

- 545 • Exposure of honey bee colonies to methoxyfenozide in supplement patty at a concentration of  
546 500 ppb in the fall reduced the colony foraging population, delayed the end of the daily activity  
547 period by 17-21 minutes, and was associated with higher internal hive temperature variability  
548 (poorer thermoregulation).
- 549 • Exposure to the colonies did not have a measurable affect on the total adult bee mass, the amount  
550 of brood, average newly-emerged bee body mass or head weight, and caged bees fed 1000 ppb  
551 methoxyfenozide in sugar syrup showed no differences in hypopharyngeal gland size.
- 552 • Colonies treated for a 2<sup>nd</sup> consecutive time the following spring showed fewer differences than in  
553 the fall.



- 554       • Continuous weight and temperature monitoring methods showed significant effects on colony-
- 555           level behavior whereas periodic colony assessments and sampling did not show effects.
- 556
- 557

## 558 **Acknowledgements**

559 The authors would like to warmly thank M. Heitlinger at the Santa Rita Experimental Range and M.  
560 Mcclaran at the University of Arizona for providing field sites for the work. In addition, the authors  
561 would like to thank S. Cook, V. Ricigliano and to two anonymous reviewers for their helpful suggestions  
562 on the paper.

563

564

565

566 **S1 Table.** Effects of treatment on dawn break point for piecewise regressions fit to continuous weight  
567 data for the Fall 2016 and Fall 2017 field experiments (PDF).

568

569 **S2 Table.** Effects of methoxyfenozide exposure on departing slopes for piecewise regressions fit to  
570 continuous weight data for the Spring 2018 field experiment (PDF).

571

572 **S3 Table.** The effects of methoxyfenozide exposure on log amplitudes of sine waves fit to detrended  
573 continuous temperature data (daily internal hive temperature variation) for the Fall 2016 and Fall 2017  
574 field experiments 30 d after the end of treatment until the final assessment (PDF).

575

576 **S1 File.** Experimental data (XLSX).

577

## 578 **References**

579

- 580 1. Mullin CA, Frazier M., Frazier JL, Ashcraft S, Simonds R, VanEngelsdorp D, Pettis JS (2010)  
581 High levels of miticides and agrochemicals in North American apiaries: implications for honey  
582 bee health. PLOS ONE 5:e9754, doi:10.1371/journal.pone.0009754.
- 583 2. Johnson RM (2015) Honey bee toxicology. Annu. Rev. Entomol. 60: 415-34.  
584 doi:10.1146/annurev-ento-011613-162005
- 585 3. Smagghe G, Gomez LE, Dhadialla TS (2012) Chapter Two - Bisacylhydrazine Insecticides for  
586 selective pest control. In Dhadialla T.S. (ed) Advances in Insect Physiology 43: 163-249.  
587 Academic Press.
- 588 4. Dhadialla TS, Carlson GR, Le DP (1998) New insecticides with ecdysteroidal and juvenile  
589 hormone activity. Annu. Rev. Entomol. 43: 545-569.
- 590 5. Retnakaran A, Krell P, Feng Q, Arif B (2003) Ecdysone agonists: mechanism and importance in  
591 controlling insect pests of agriculture and forestry. Arch. Ins. Biochem. Physiol. 54: 187-99.
- 592 6. Baker NT (2017) Estimated annual agricultural pesticide use by crop group for states of the  
593 conterminous United States; 1992-2015. Survey UG, US Geological Survey, Reston; VA.  
594 doi:10.5066/F7NP22KM.
- 595 7. Higbee BS, Siegel JP (2012) Field efficacy and application timing of methoxyfenozide; a  
596 reduced-risk treatment for control of navel orangeworm (Lepidoptera: Pyralidae) in almond. J.  
597 Econ. Entomol. 105: 1702-1711.
- 598 8. Sanchez-Bayo F, Goka K (2014) Pesticide residues and bees – A risk assessment. PLOS ONE  
599 9:e94482; doi:10.1371/journal.pone.0094482.
- 600 9. Zhu YC, Adamczyk J, Rinderer T, Yao J, Danka R, Luttrell R, Gore J (2015) Spray toxicity and  
601 risk potential of 42 commonly used formulations of row crop pesticides to adult honey bees  
602 (Hymenoptera: Apidae). J. Econ. Entomol. 108: 2640-2647; doi: 10.1093/jee/tov269.

- 603 10. Curtis B, Ludwig G (2013) Best management practices using insecticides during bloom and  
604 honey bee brood; Almond Board of California p 1.
- 605 11. Johnson R, Ellis M, Mullin C, Frazier M (2010) Pesticides and honey bee toxicity — USA.  
606 *Apidologie* 41: 312-331.
- 607 12. Fisher A II, Colman C, Hoffmann C, Fritz B, Rangel J (2018) The effects of the insect growth  
608 regulators methoxyfenozide and pyriproxyfen and the acaricide bifenthrin on honey bee  
609 (Hymenoptera: Apidae) forager survival. *J. Econ. Entomol.* 111: 510–516;  
610 doi:10.1093/jee/tox347
- 611 13. Fourrier J, Deschamps M, Droin L, Alaux C, Fortini D, Beslay D, Le Conte Y, Devillers J,  
612 Aupinel P, Decourtye A (2015) Larval exposure to the juvenile hormone analog pyriproxyfen  
613 disrupts acceptance of and social behavior performance in adult honey bees. *PLOS ONE* 10(7):m  
614 e0132985. <https://doi.org/10.1371/journal.pone.0132985>
- 615 14. Rand EE, Smit S, Beukes M, Apostolides Z, Pirk CWW, Nicolson SW (2015) Detoxification  
616 mechanisms of honey bees (*Apis mellifera*) resulting in tolerance of dietary nicotine. *Sci. Rep.* 5,  
617 11779; doi: 10.1038/srep11779.
- 618 15. Kliot A, Ghanim M (2012) Fitness costs associated with insecticide resistance. *Pest Manag. Sci.*  
619 68: 1431-7.
- 620 16. Després L, David J-P, Gallet C (2007) The evolutionary ecology of insect resistance to plant  
621 chemicals. *Trends in Ecology & Evolution* 22: 298-307.
- 622 17. Mao W, Schuler MA, Berenbaum MR (2011) CYP9Q-mediated detoxification of acaricides in  
623 the honey bee (*Apis mellifera*). *Proc. Nat. Acad. Sci.* 108: 12657-12662.
- 624 18. De Smet L, Hatjina F, Ioannidis P, Hamamtzoglou A, Schoonvaere K, Francis F, Meeus I,  
625 Smagghe G, de Graaf DC (2017) Stress indicator gene expression profiles, colony dynamics and  
626 tissue development of honey bees exposed to sub-lethal doses of imidacloprid in laboratory and  
627 field experiments. *PLOS ONE* 12, e0171529; doi:10.1371/journal.pone.0171529.

- 628 19. Heylen K, Gobin B, Arckens L, Huybrechts R, Billen J (2011) The effects of four crop protection  
629 products on the morphology and ultrastructure of the hypopharyngeal gland of the European  
630 honeybee, *Apis mellifera*. *Apidologie* 42: 103-116.
- 631 20. Corby-Harris V, Meador CA, Snyder LA, Schwan MR, Maes P, Jones BM, Walton A, Anderson  
632 KE (2016) Transcriptional; translational; and physiological signatures of undernourished honey  
633 bees (*Apis mellifera*) suggest a role for hormonal factors in hypopharyngeal gland degradation. *J*  
634 *Insect Physiol.* 85: 65-75.
- 635 21. Ricigliano VA, Mott BM, Floyd AS, Copeland DC, Carroll MJ, Anderson KE (2018) Honey bees  
636 overwintering in a southern climate: longitudinal effects of nutrition and queen age on colony-  
637 level molecular physiology and performance. *Sci. Rep.* 10475; doi:10.1038/s41598-018-28732-z
- 638 22. Meikle WG, Rector BG, Mercadier G, Holst N (2008) Within-day variation in continuous hive  
639 weight data as a measure of honey bee colony activity. *Apidologie* 39: 694-707
- 640 23. Meikle WG, Holst N (2015) Application of continuous monitoring of honey bee colonies,  
641 *Apidologie* 46:10-22. doi: 10.1007/s13592-014-0298-x.
- 642 24. Meikle WG, Weiss M, Stillwell AR (2016) Monitoring colony phenology using within-day  
643 variability in continuous weight and temperature of honey bee hives. *Apidologie* 47: 1-14.  
644 doi:10.1007/s13592-015-0370-1.
- 645 25. Meikle WG, Adamczyk JJ, Weiss M, Gregorc A, Johnson DR, Stewart SD, et al. (2016)  
646 Sublethal effects of imidacloprid on honey bee colony growth and activity at three sites in the  
647 U.S. *PLoS ONE* 11(12): e0168603. doi: 10.1371/journal.pone.0168603
- 648 26. Meikle WG, Holst N, Colin T, Weiss M, Carroll MJ, McFrederick QS, Barron AB (2018) Using  
649 within-day hive weight changes to measure environmental effects on honey bee colonies. *PLOS*  
650 *ONE* 13(5), e0197589; doi:10.1371/journal.pone.0197589
- 651 27. Muggeo VMR (2008) Segmented: an R package to fit regression models with broken-line  
652 relationships. *R News* 8/1: 20–25.

- 653 28. Wood SN (2001) Minimizing model fitting objectives that contain spurious local minima by  
654 bootstrap restarting. *Biometrics* 57: 240-244. PMID: 11252605
- 655 29. Meikle WG, Weiss M (2017) Monitoring colony-level effects of sublethal pesticide exposure on  
656 honey bees. *J. Vis. Exp.* 129: e56355; doi: 10.3791/56355.
- 657 30. Hrassnigg N, Crailsheim K (1998) The influence of brood on the pollen consumption of worker  
658 bees (*Apis mellifera* L.) *J. Ins. Physiol.* 44: 393-404.
- 659 31. Corby-Harris V, Snyder L (2018) Measuring hypopharyngeal gland acinus size in honey bee  
660 (*Apis mellifera*) workers. *J. Vis. Exp.*(in press)
- 661 32. Anonymous (2003) Public Report 2003-3. Methoxyfenozide. California Department of Pesticide  
662 Regulation Tracking ID 195668, 196546.
- 663 33. Wu-Smart J, Spivak M (2016) Sub-lethal effects of dietary neonicotinoid insecticide exposure on  
664 honey bee queen fecundity and colony development. *Sci. Rep.* 6: 32108, doi: 10.1038/srep32108.
- 665 34. Wood SC, Kozii I, Koziy RV, Epp T, Simko E (2018) Comparative chronic toxicity of three  
666 neonicotinoids on New Zealand packaged honey bees. *PLoS ONE* 13(1): e0190517;  
667 doi:10.1371/journal.pone.0190517  
668

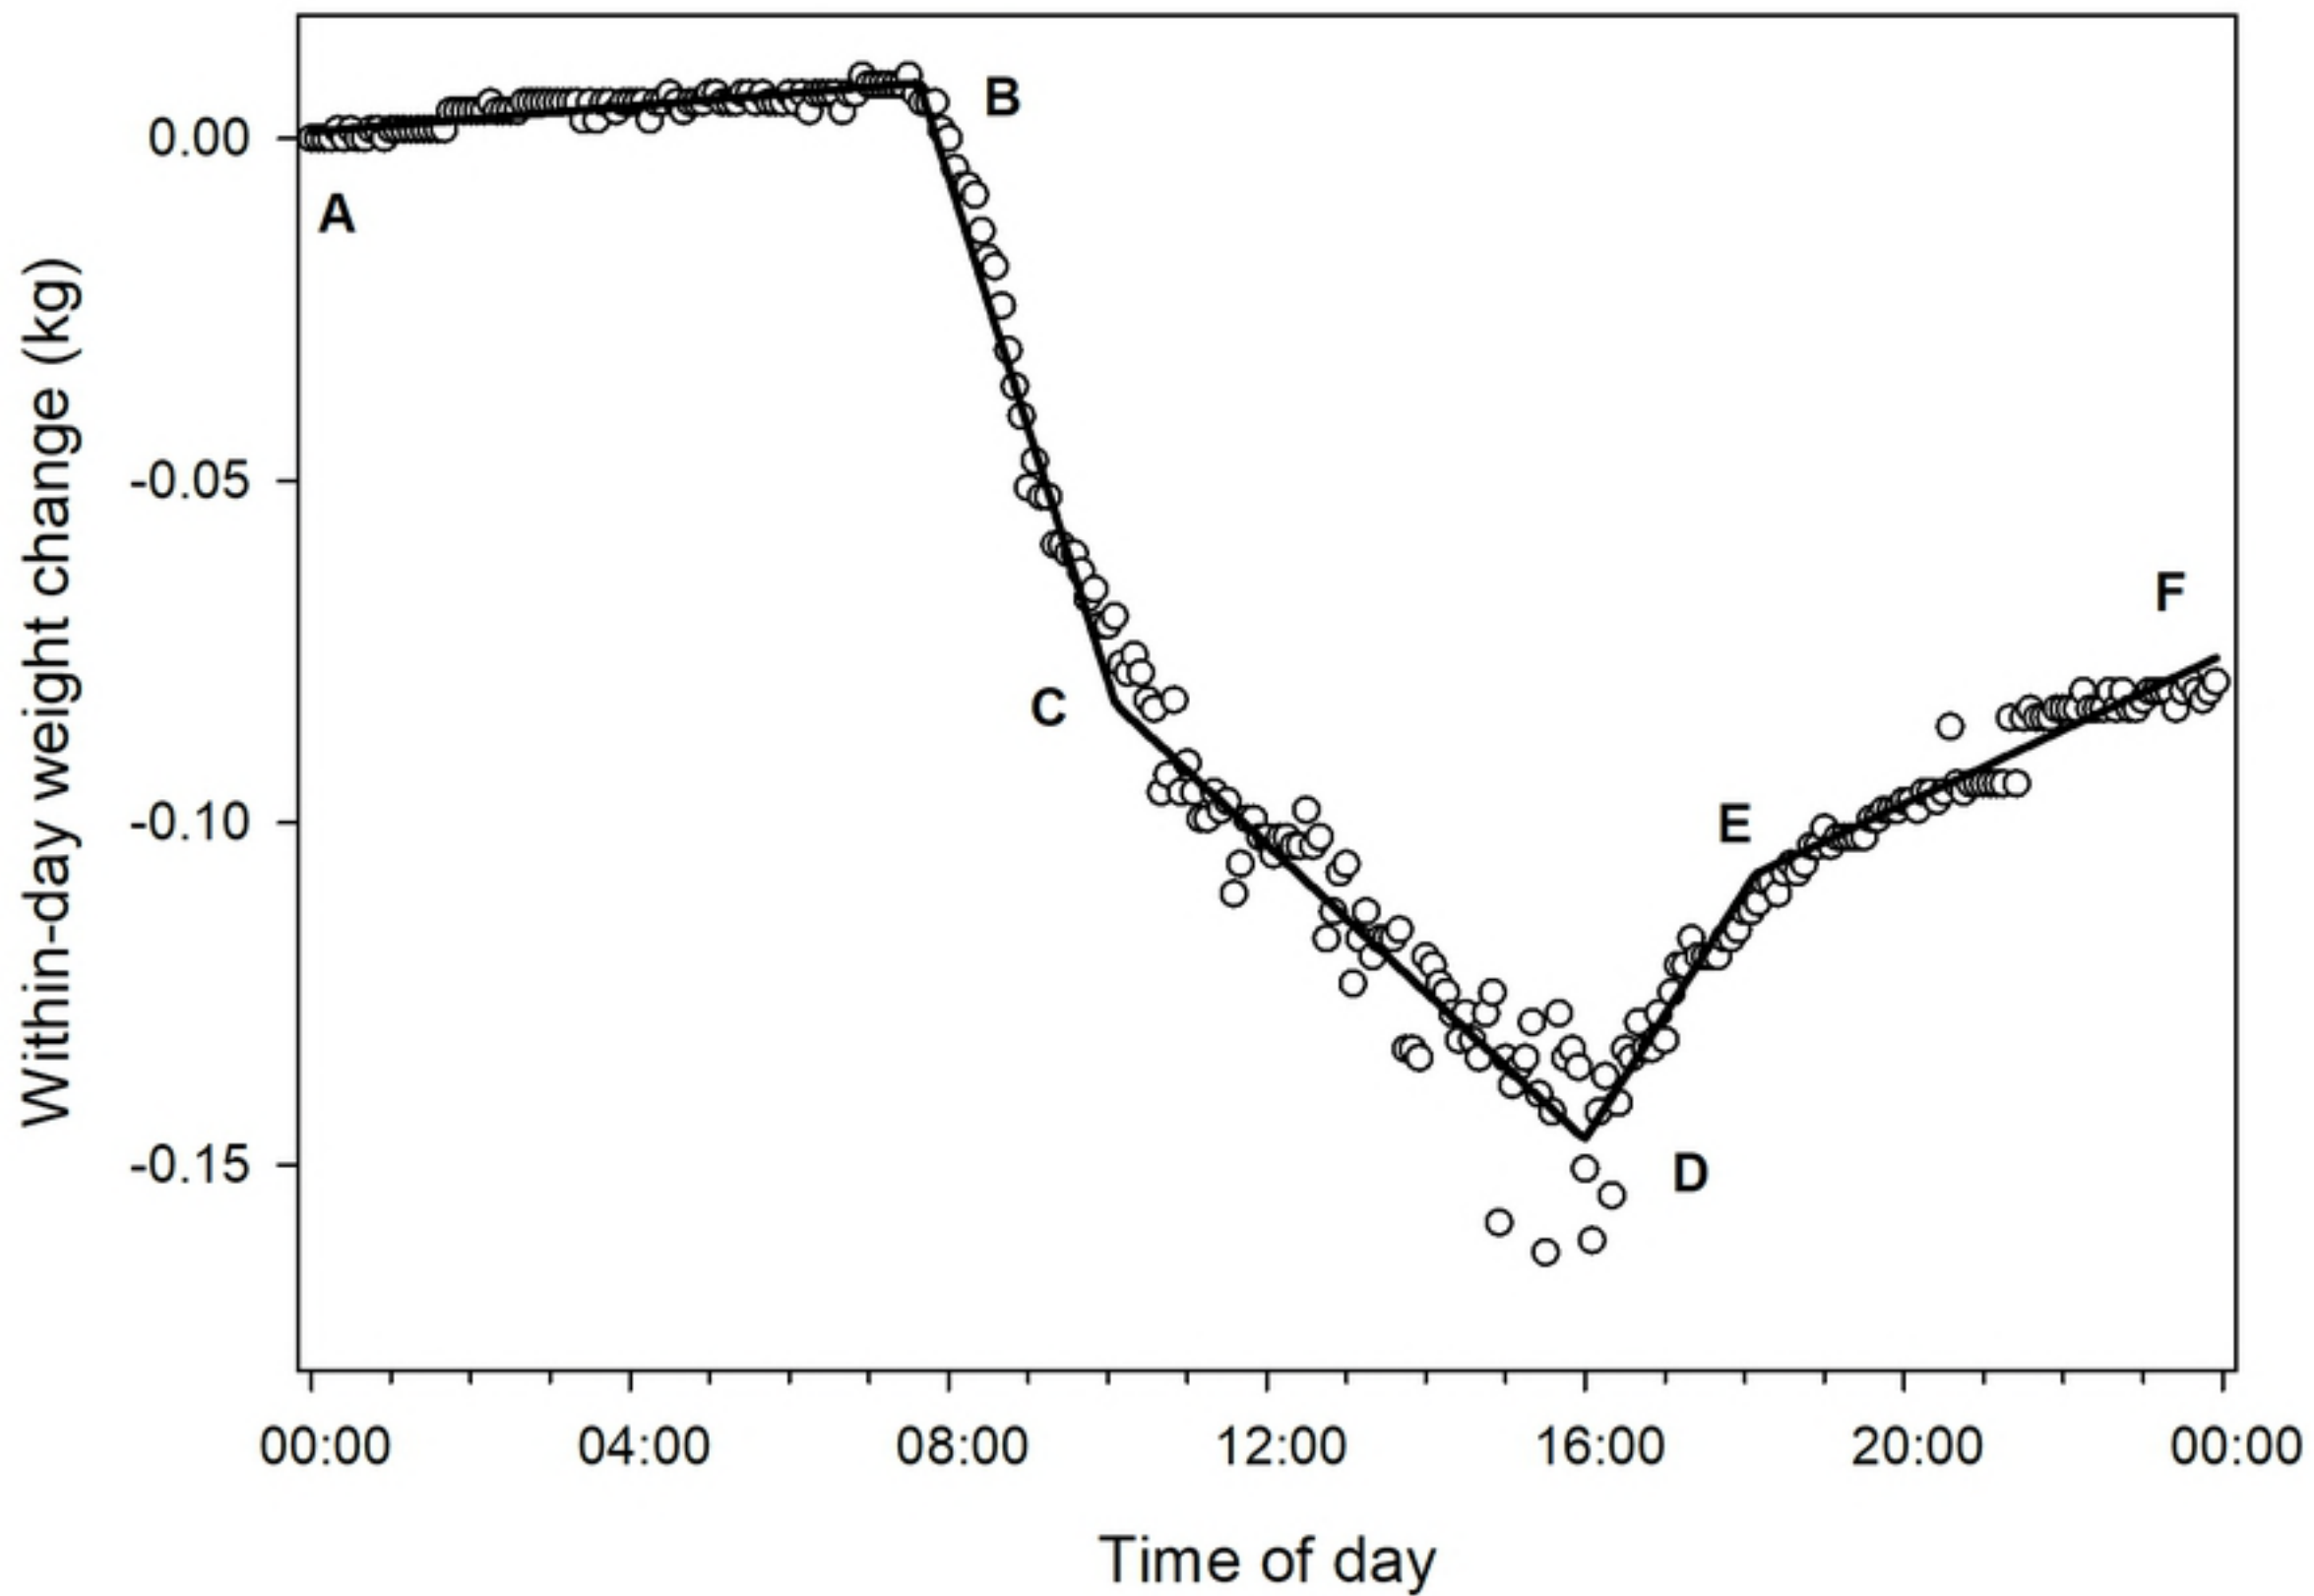



- 125 ppb
- 500 ppb
- Control

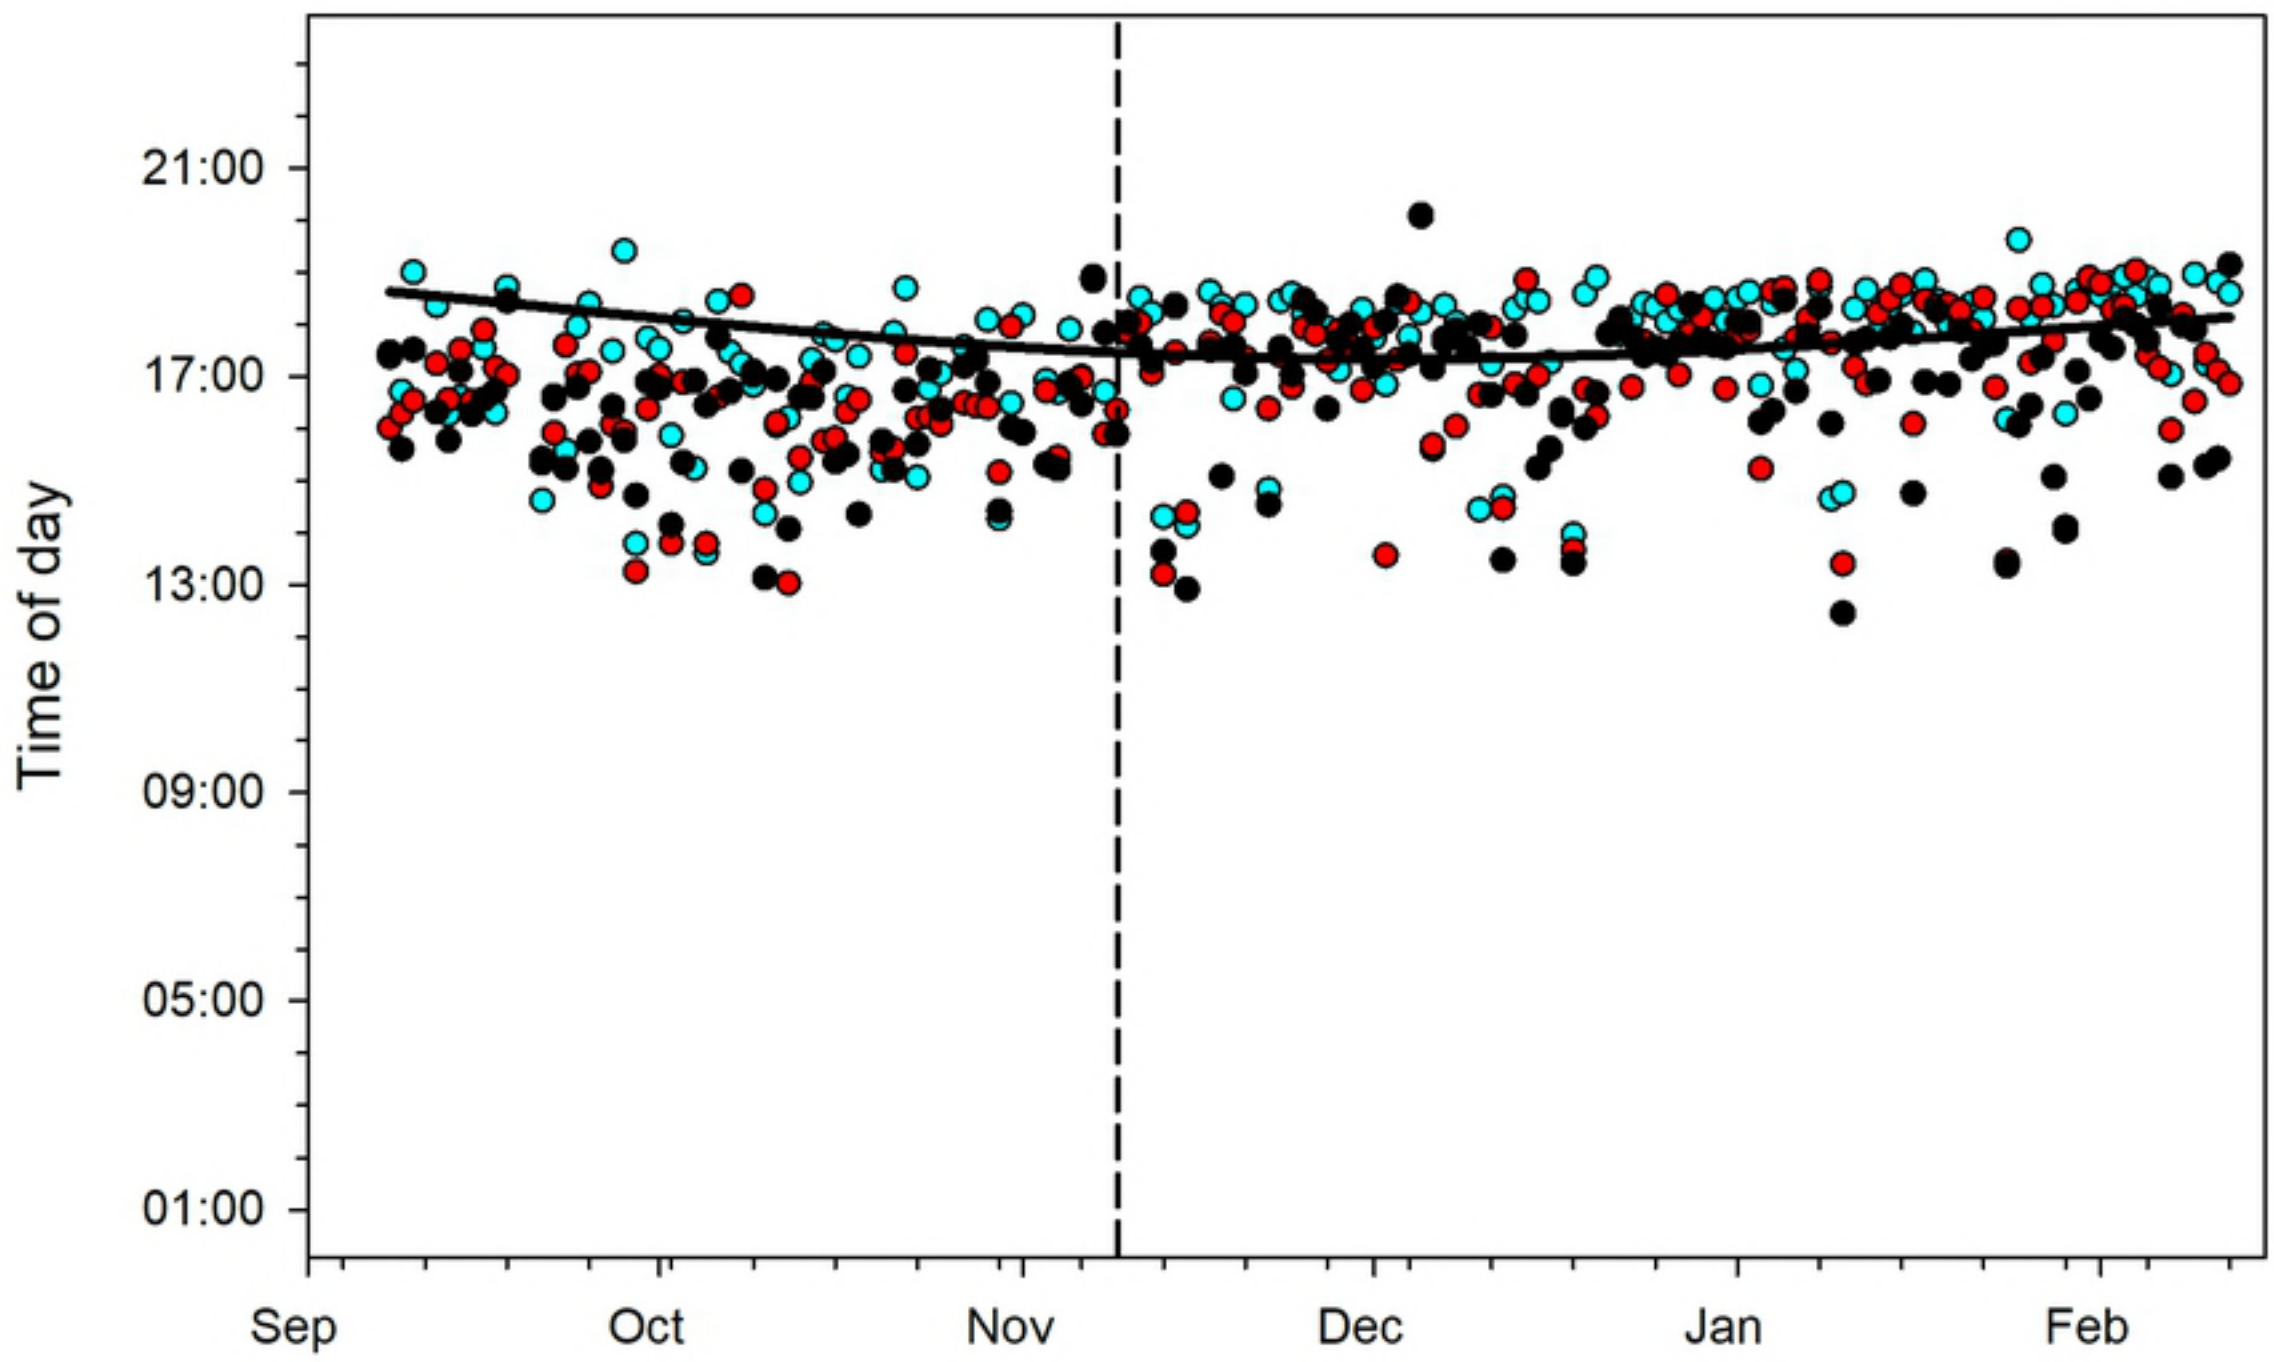

Slope of forager departure segment (g per 5 min)

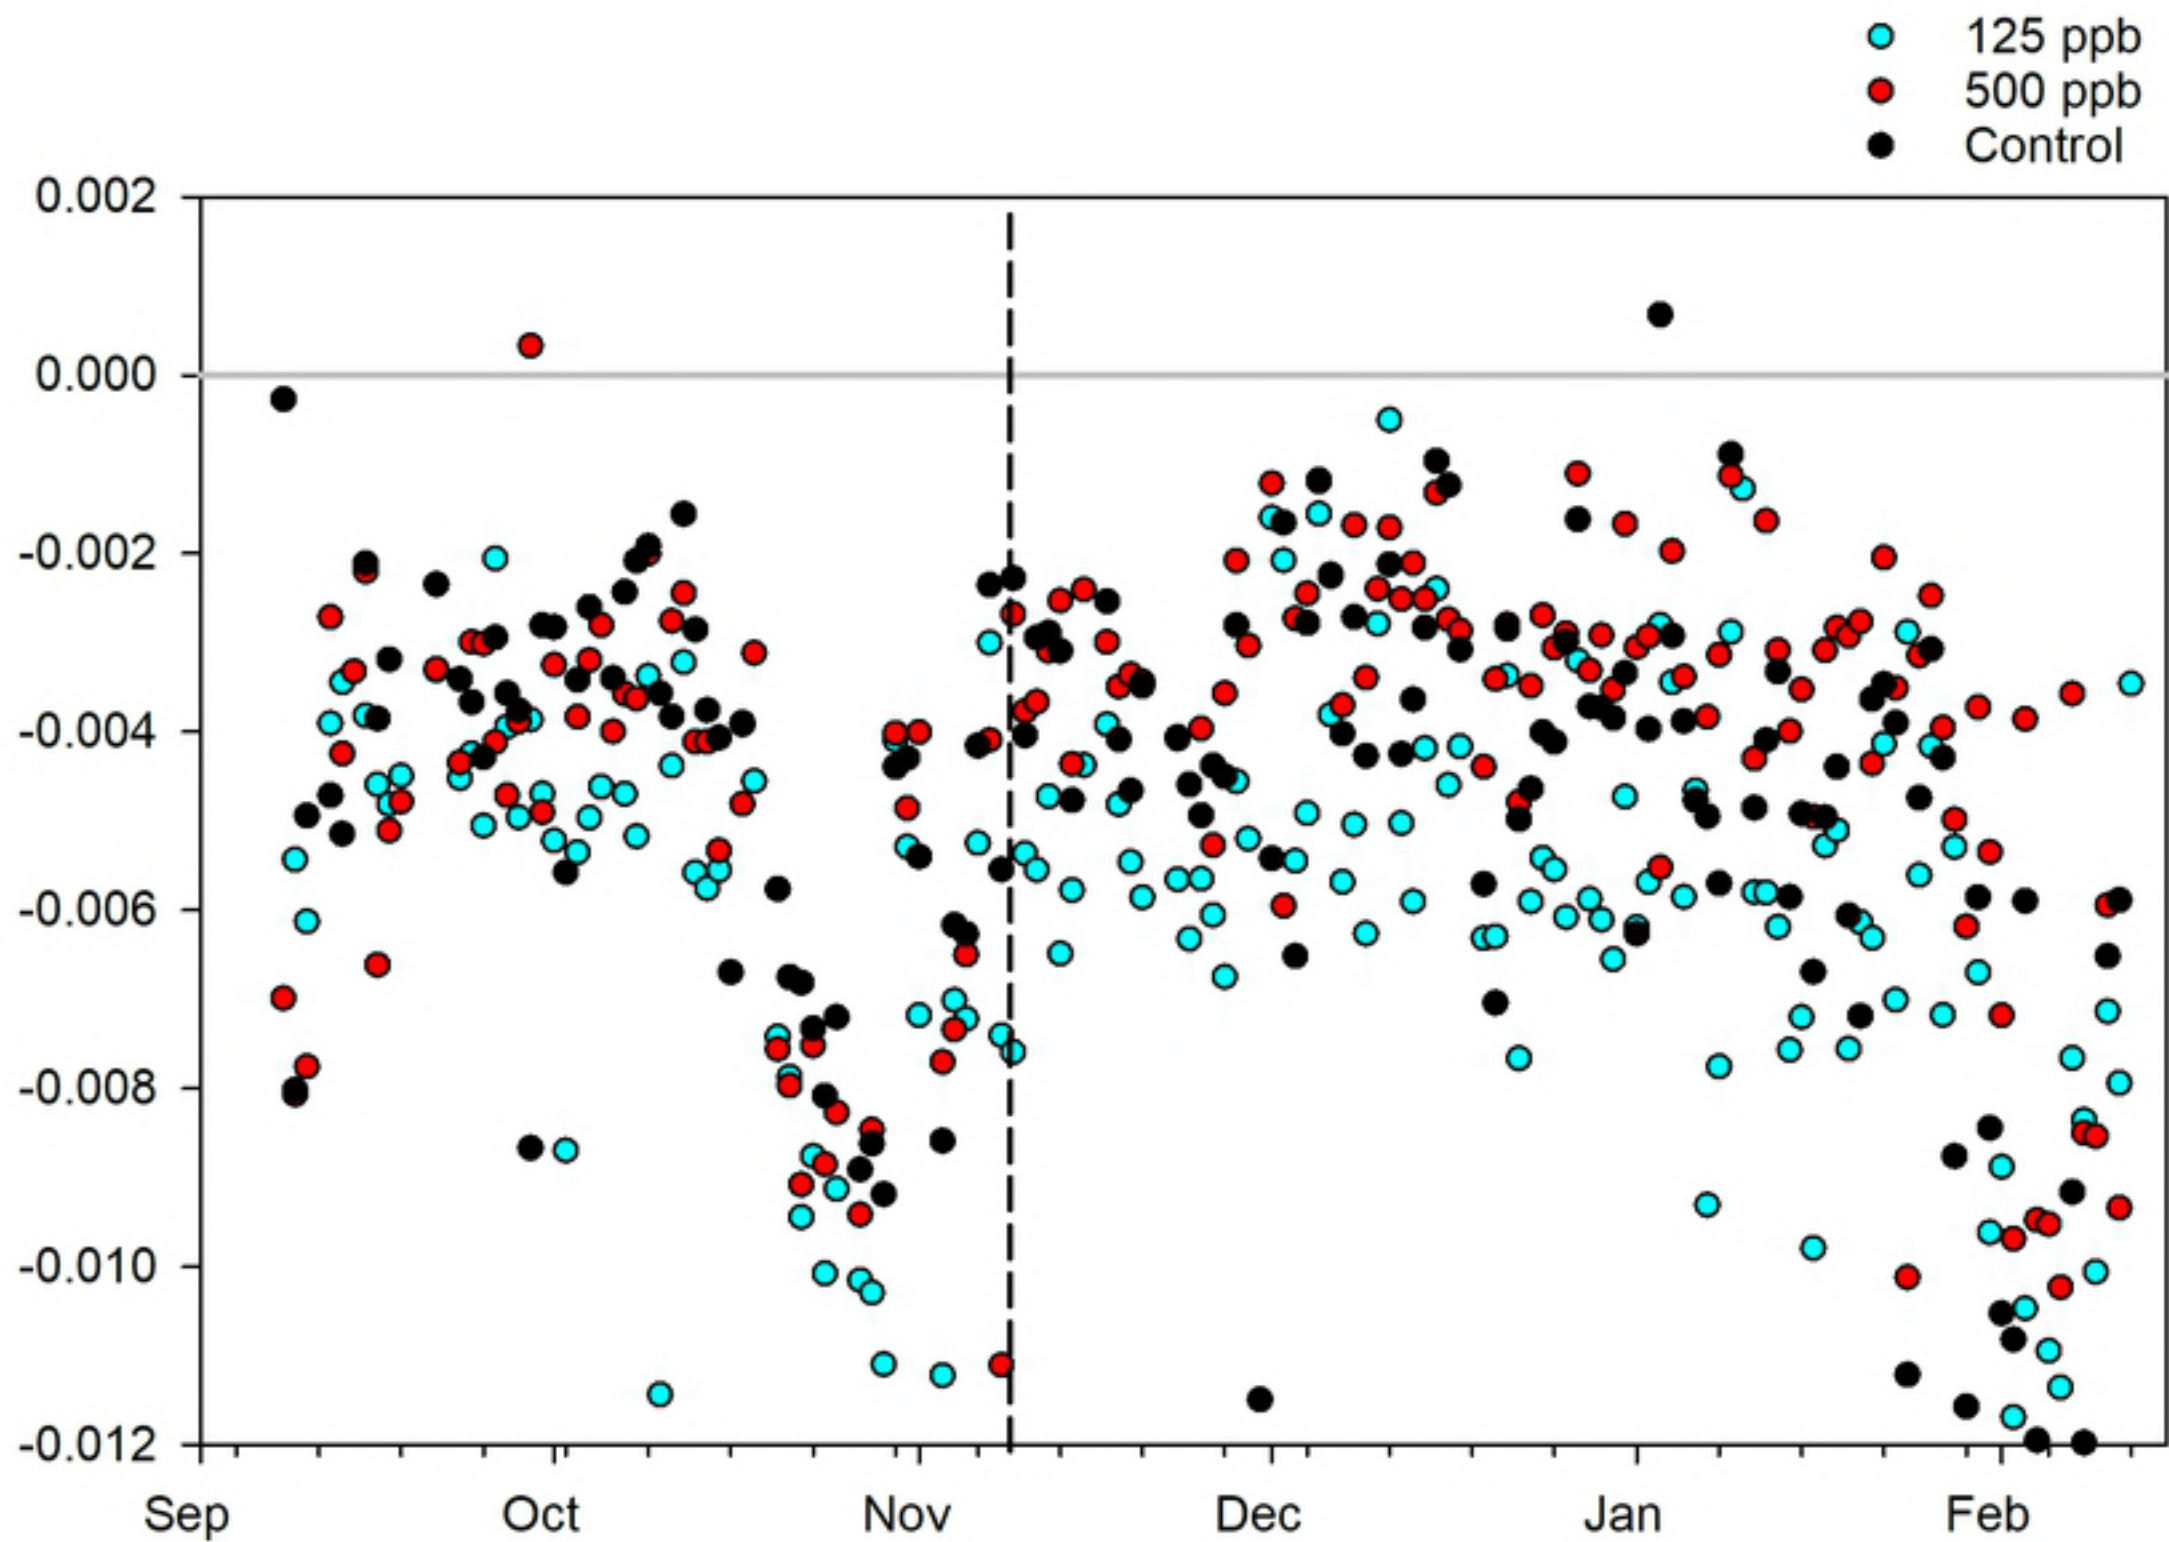

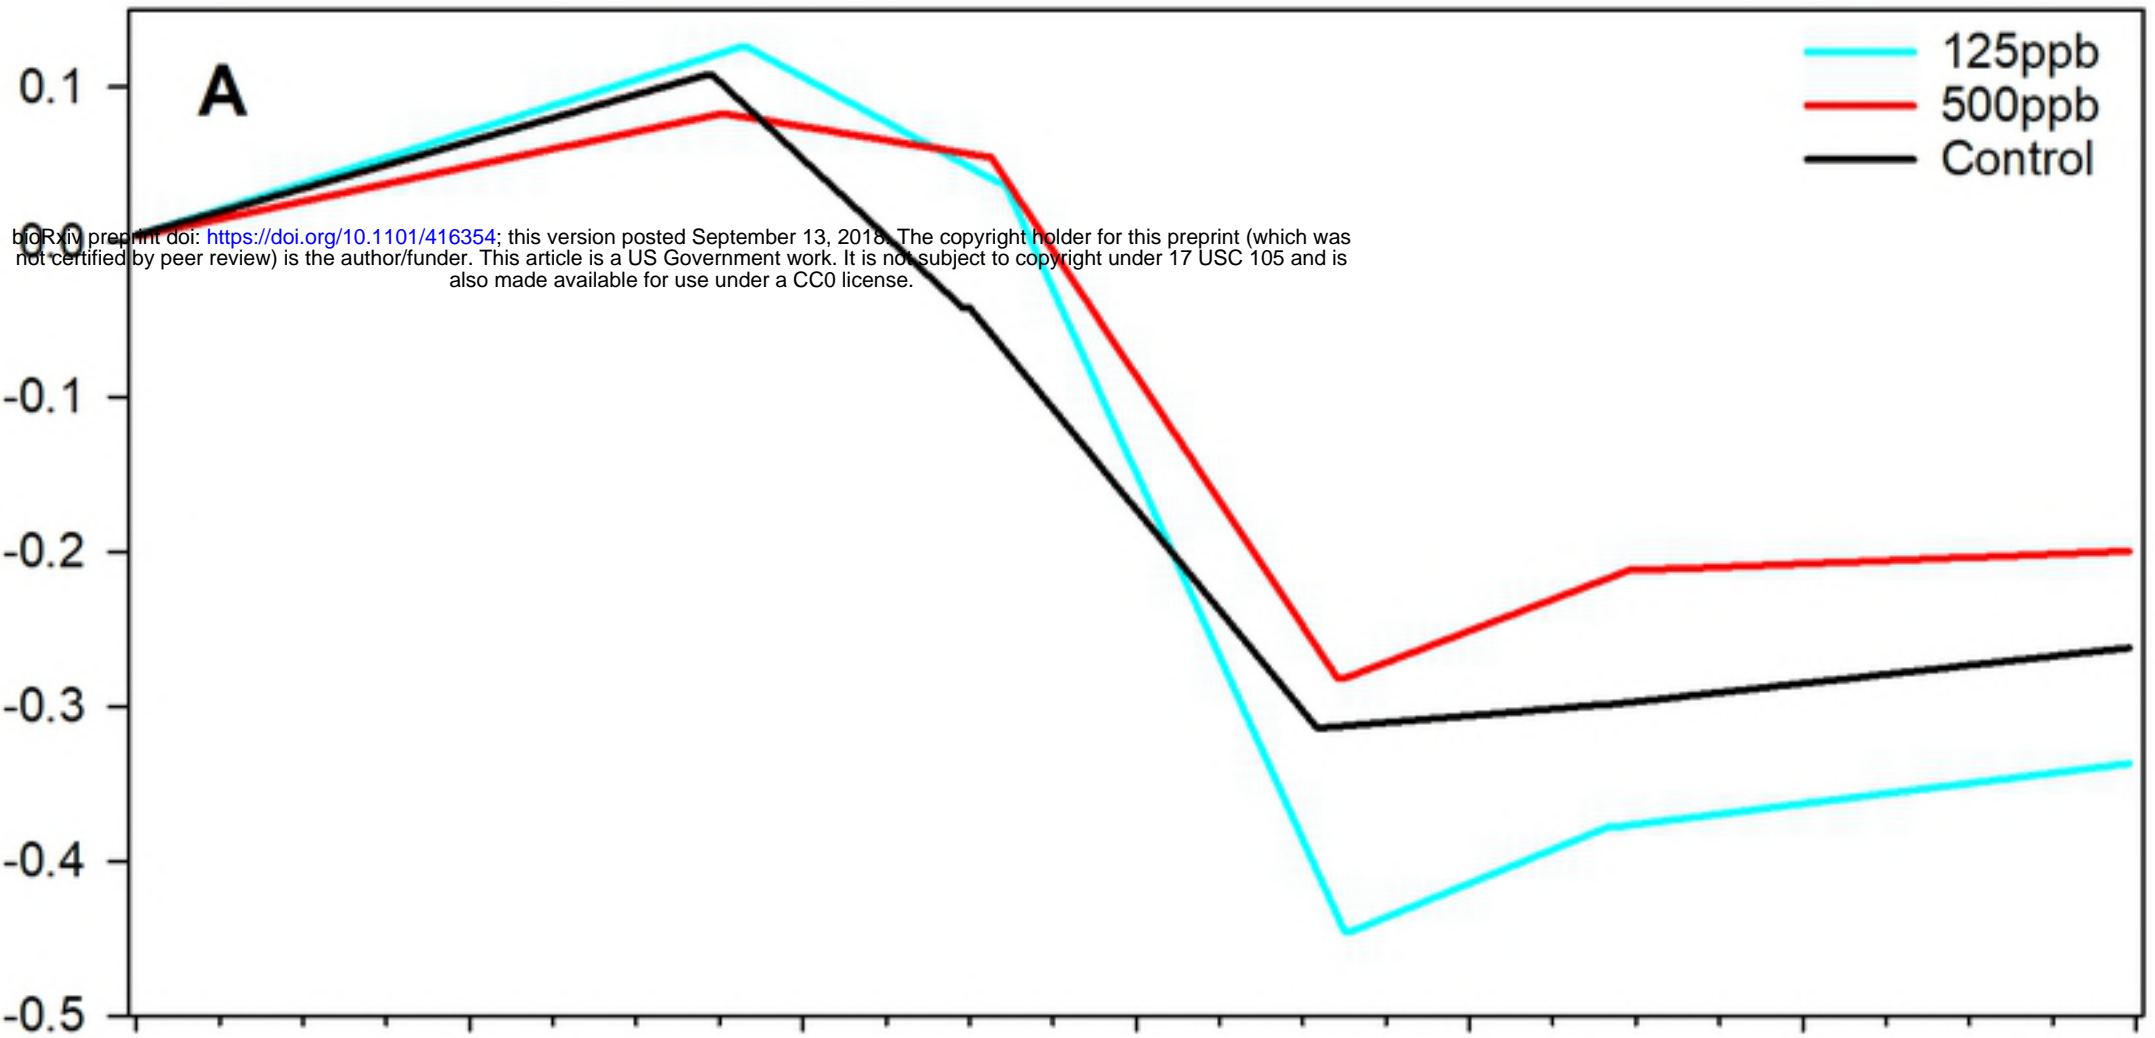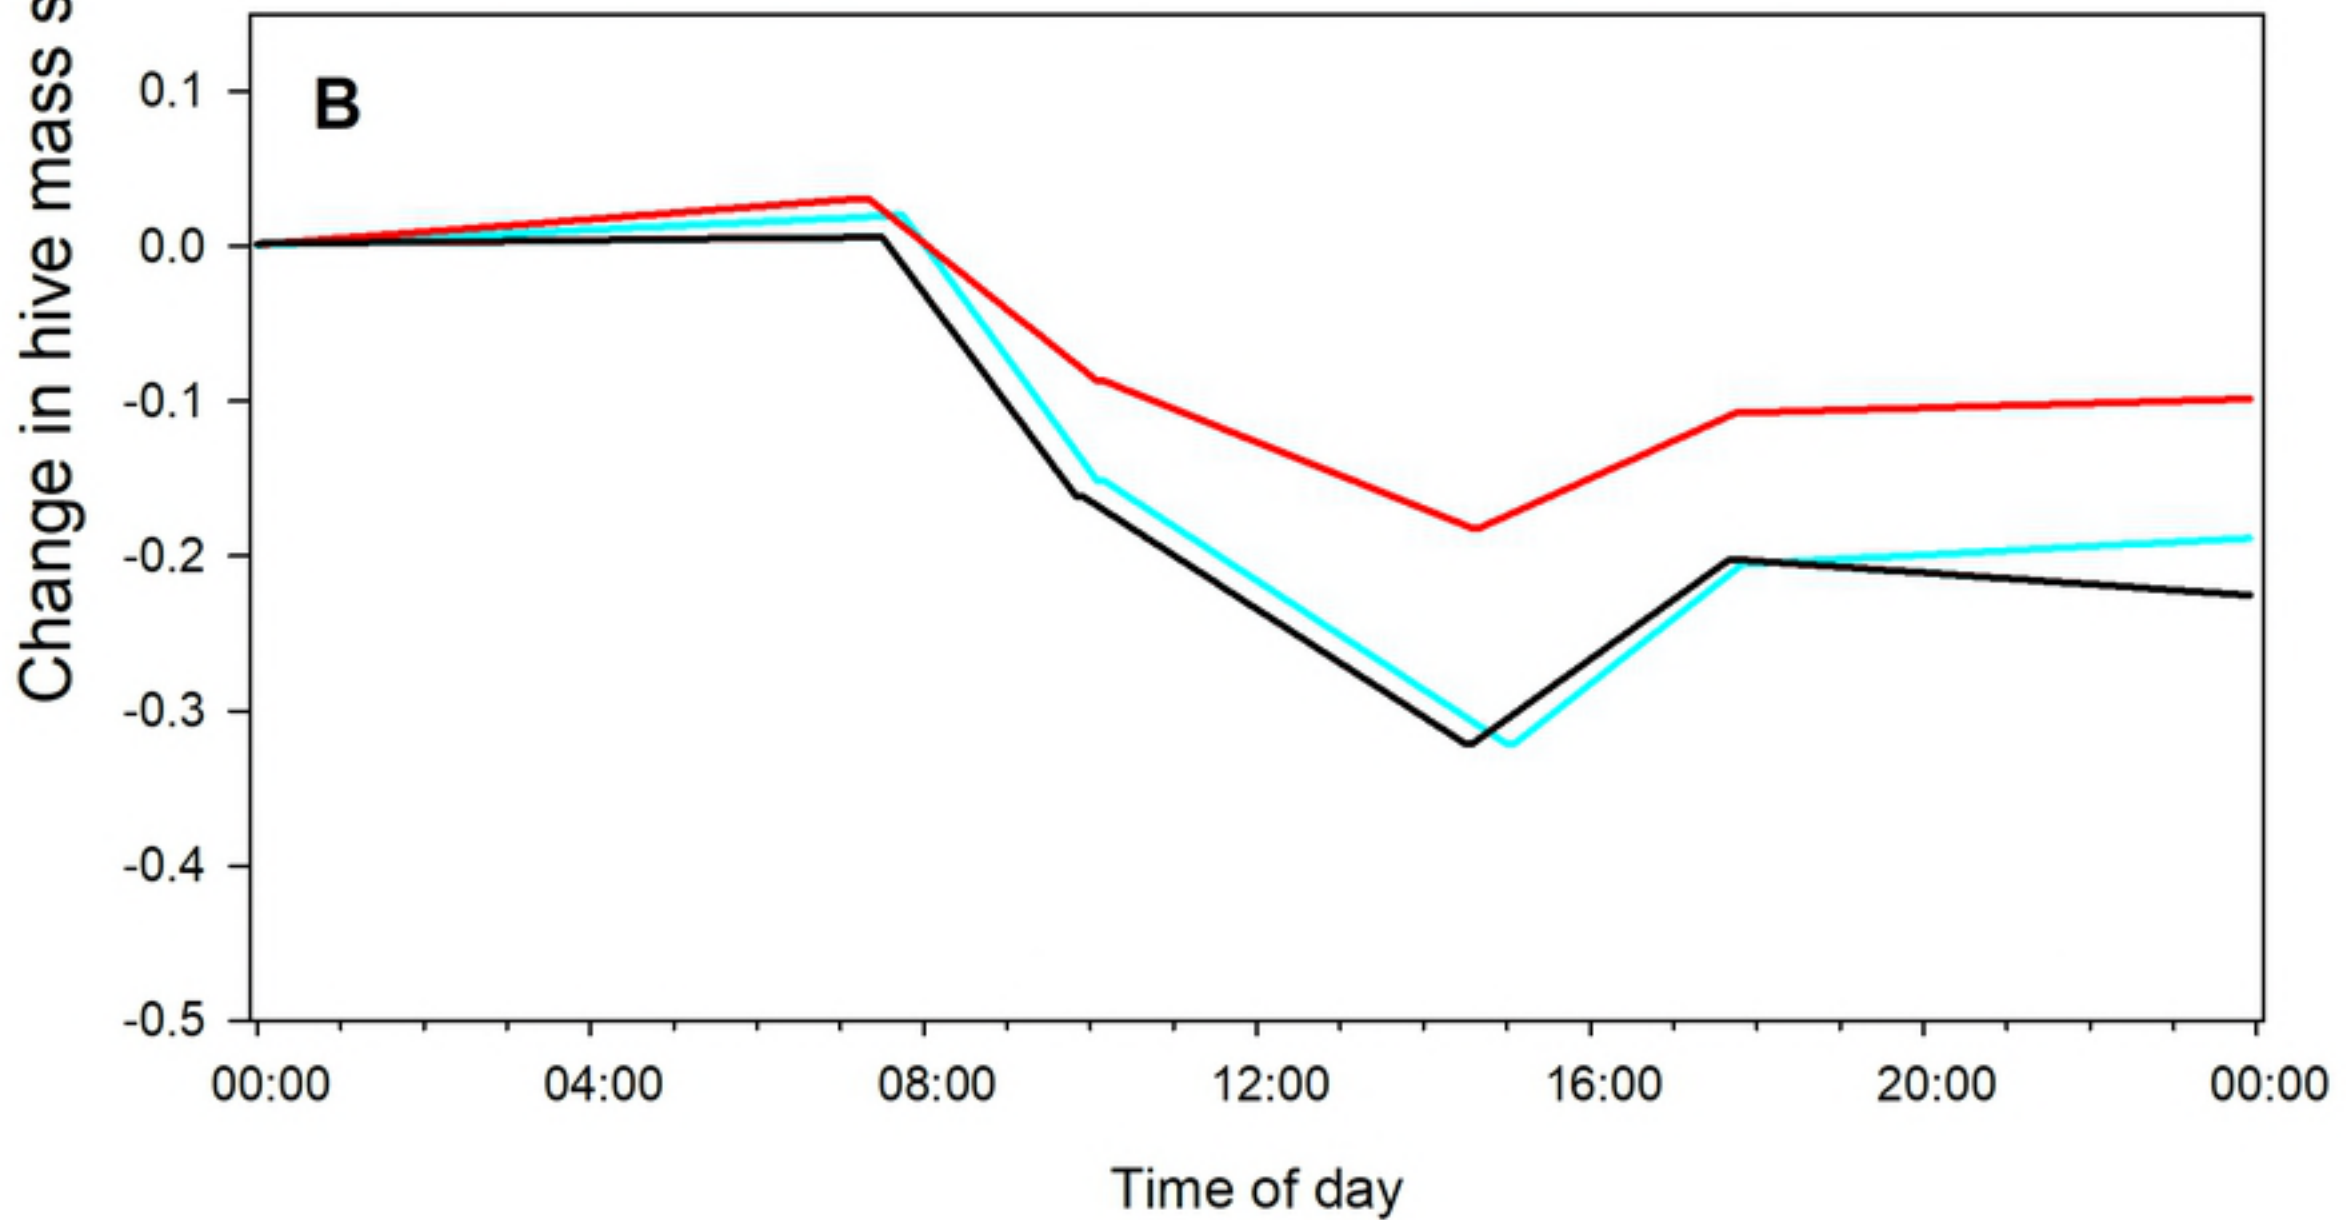

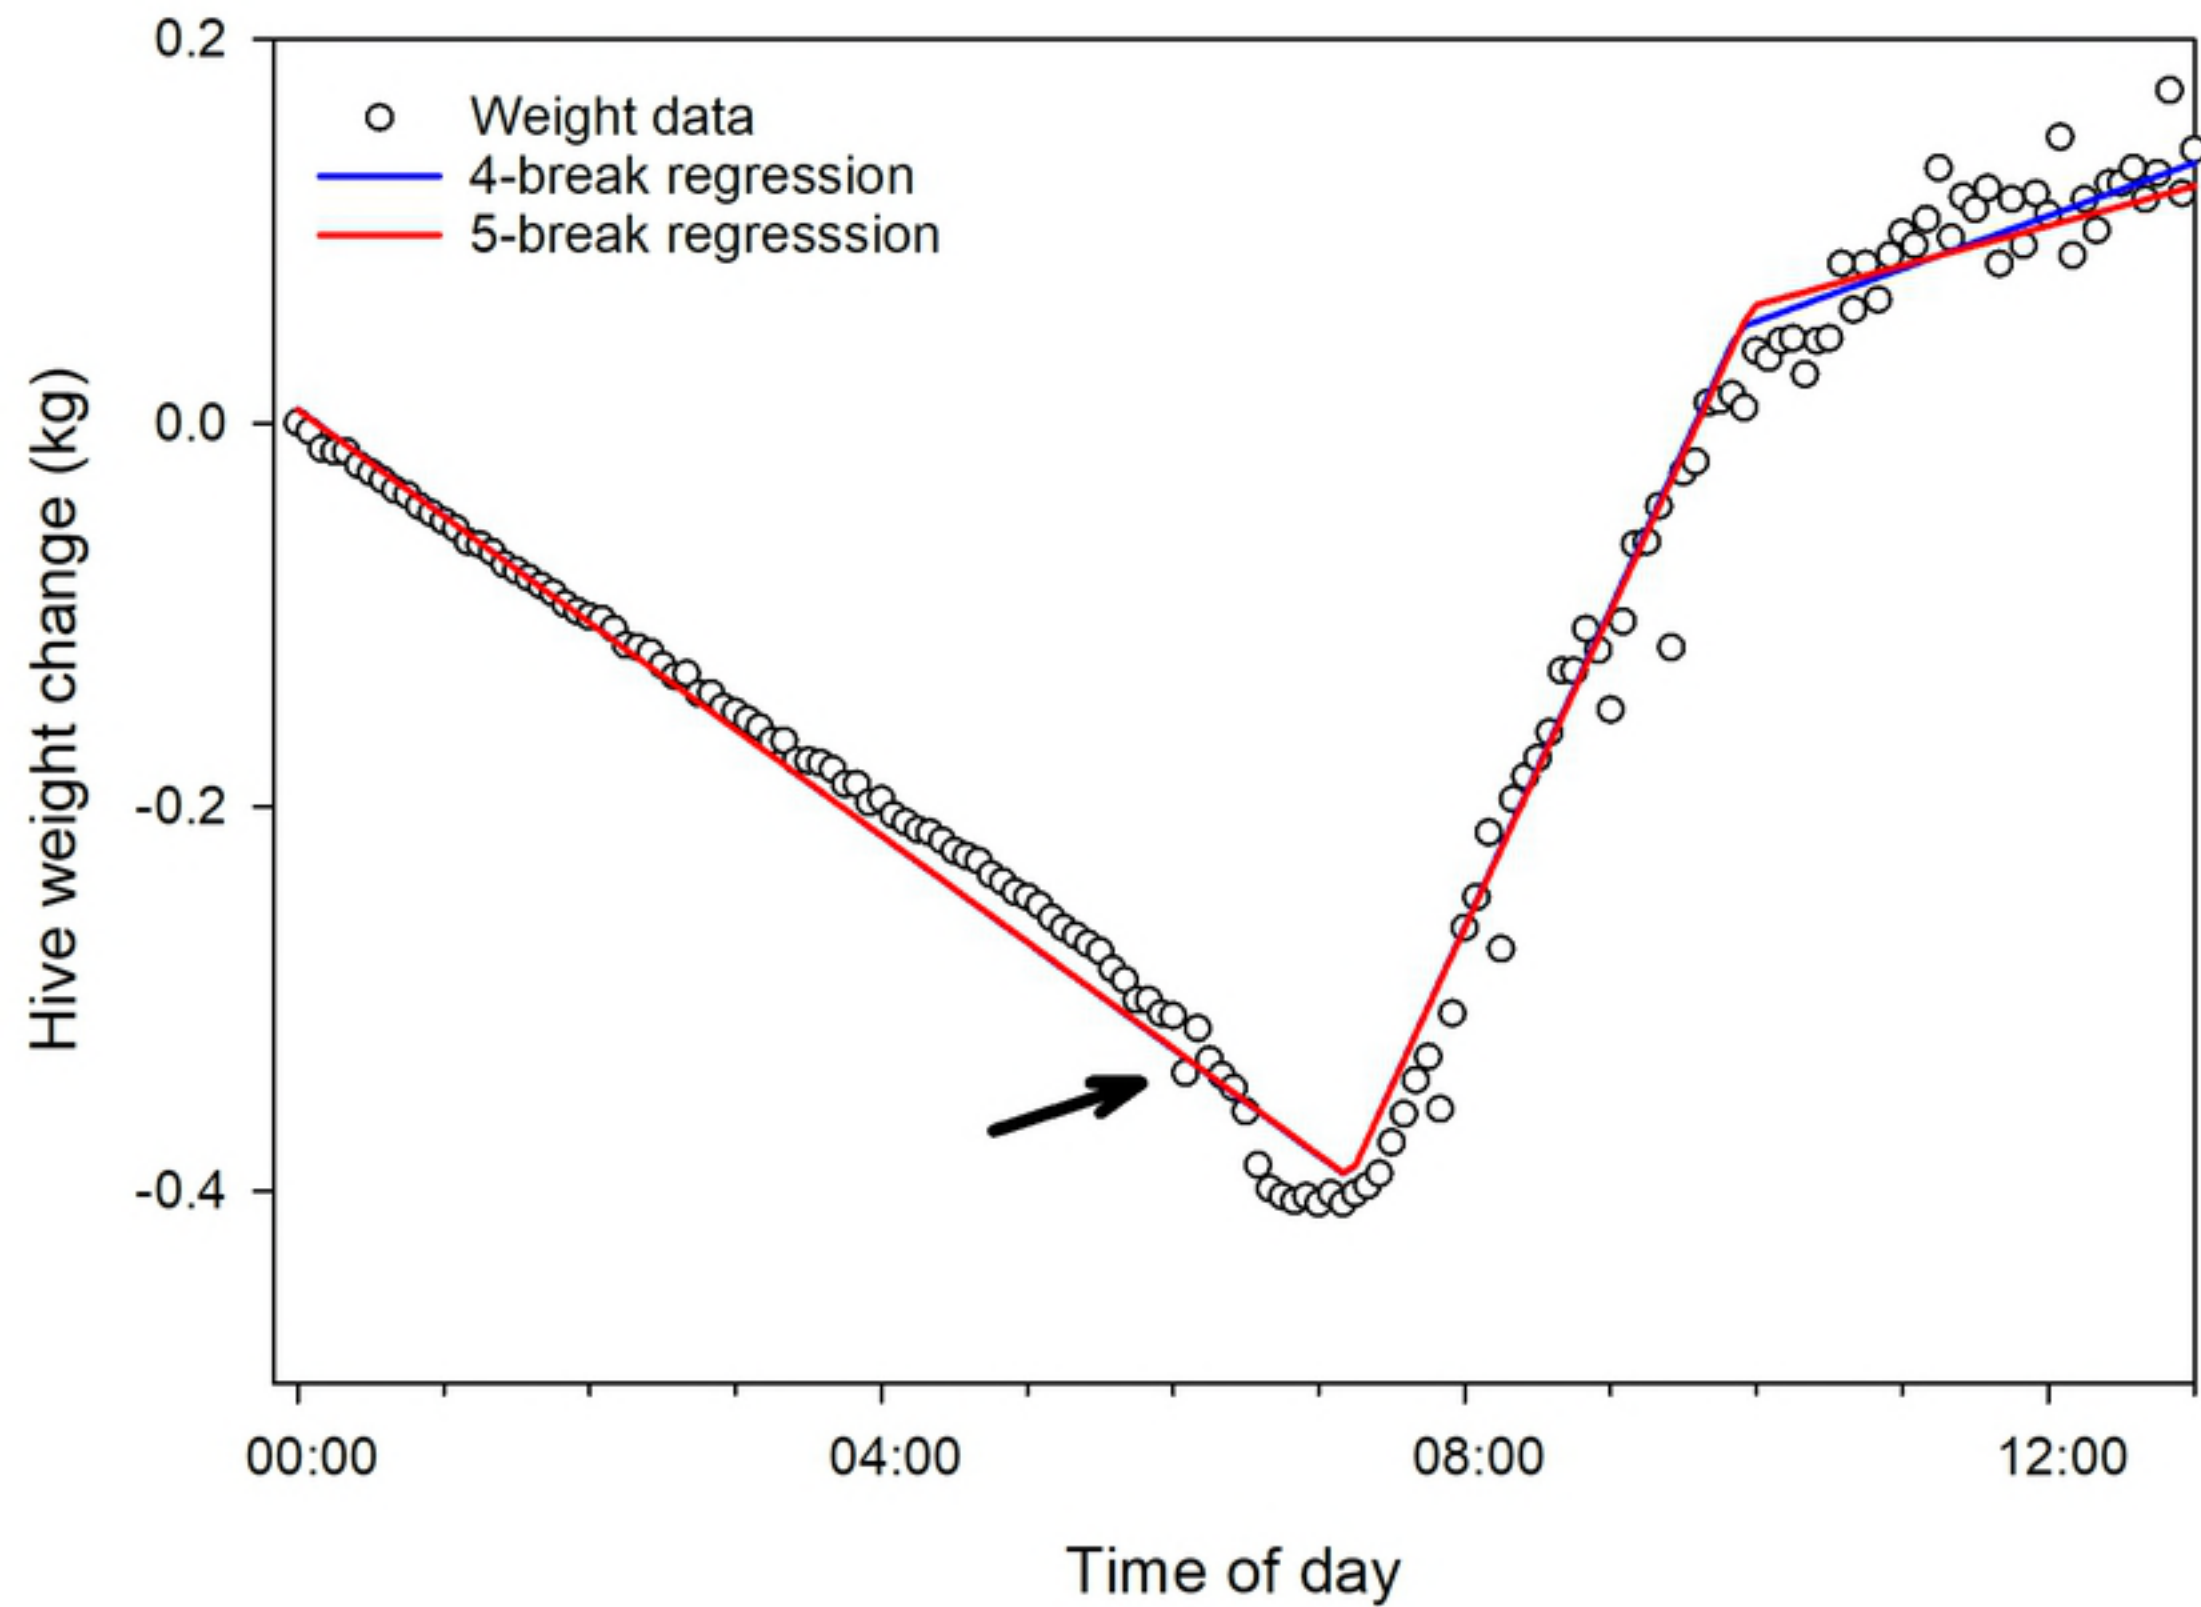

Control  
High concentration (500 ppb)  
Low concentration (125 ppb)

**A.** bioRxiv preprint doi: <https://doi.org/10.1101/416354>; this version posted September 13, 2018. The copyright holder for this preprint (which was not certified by peer review) is the author/funder. This article is a US Government work. It is not subject to copyright under 17 USC 105 and is also made available for use under a CC0 license.

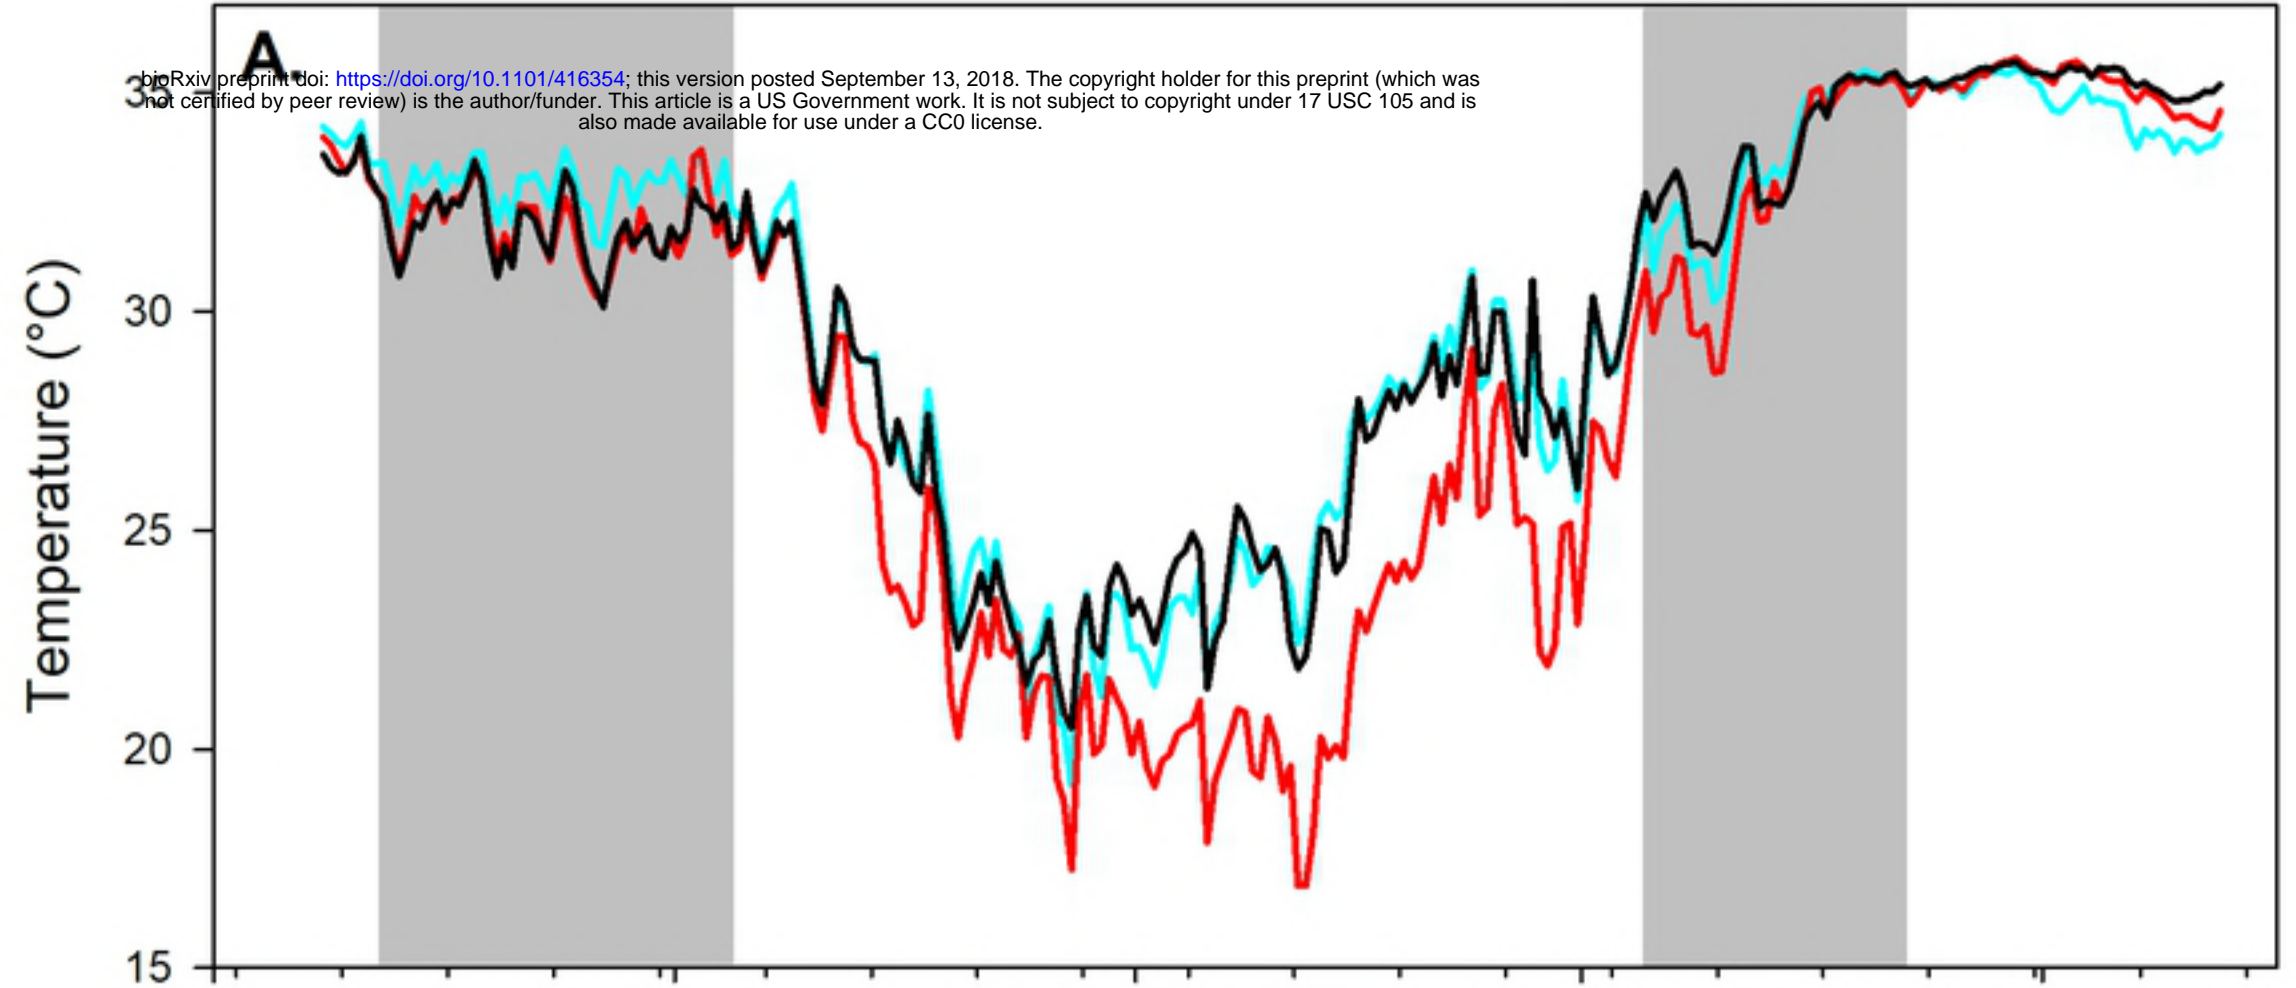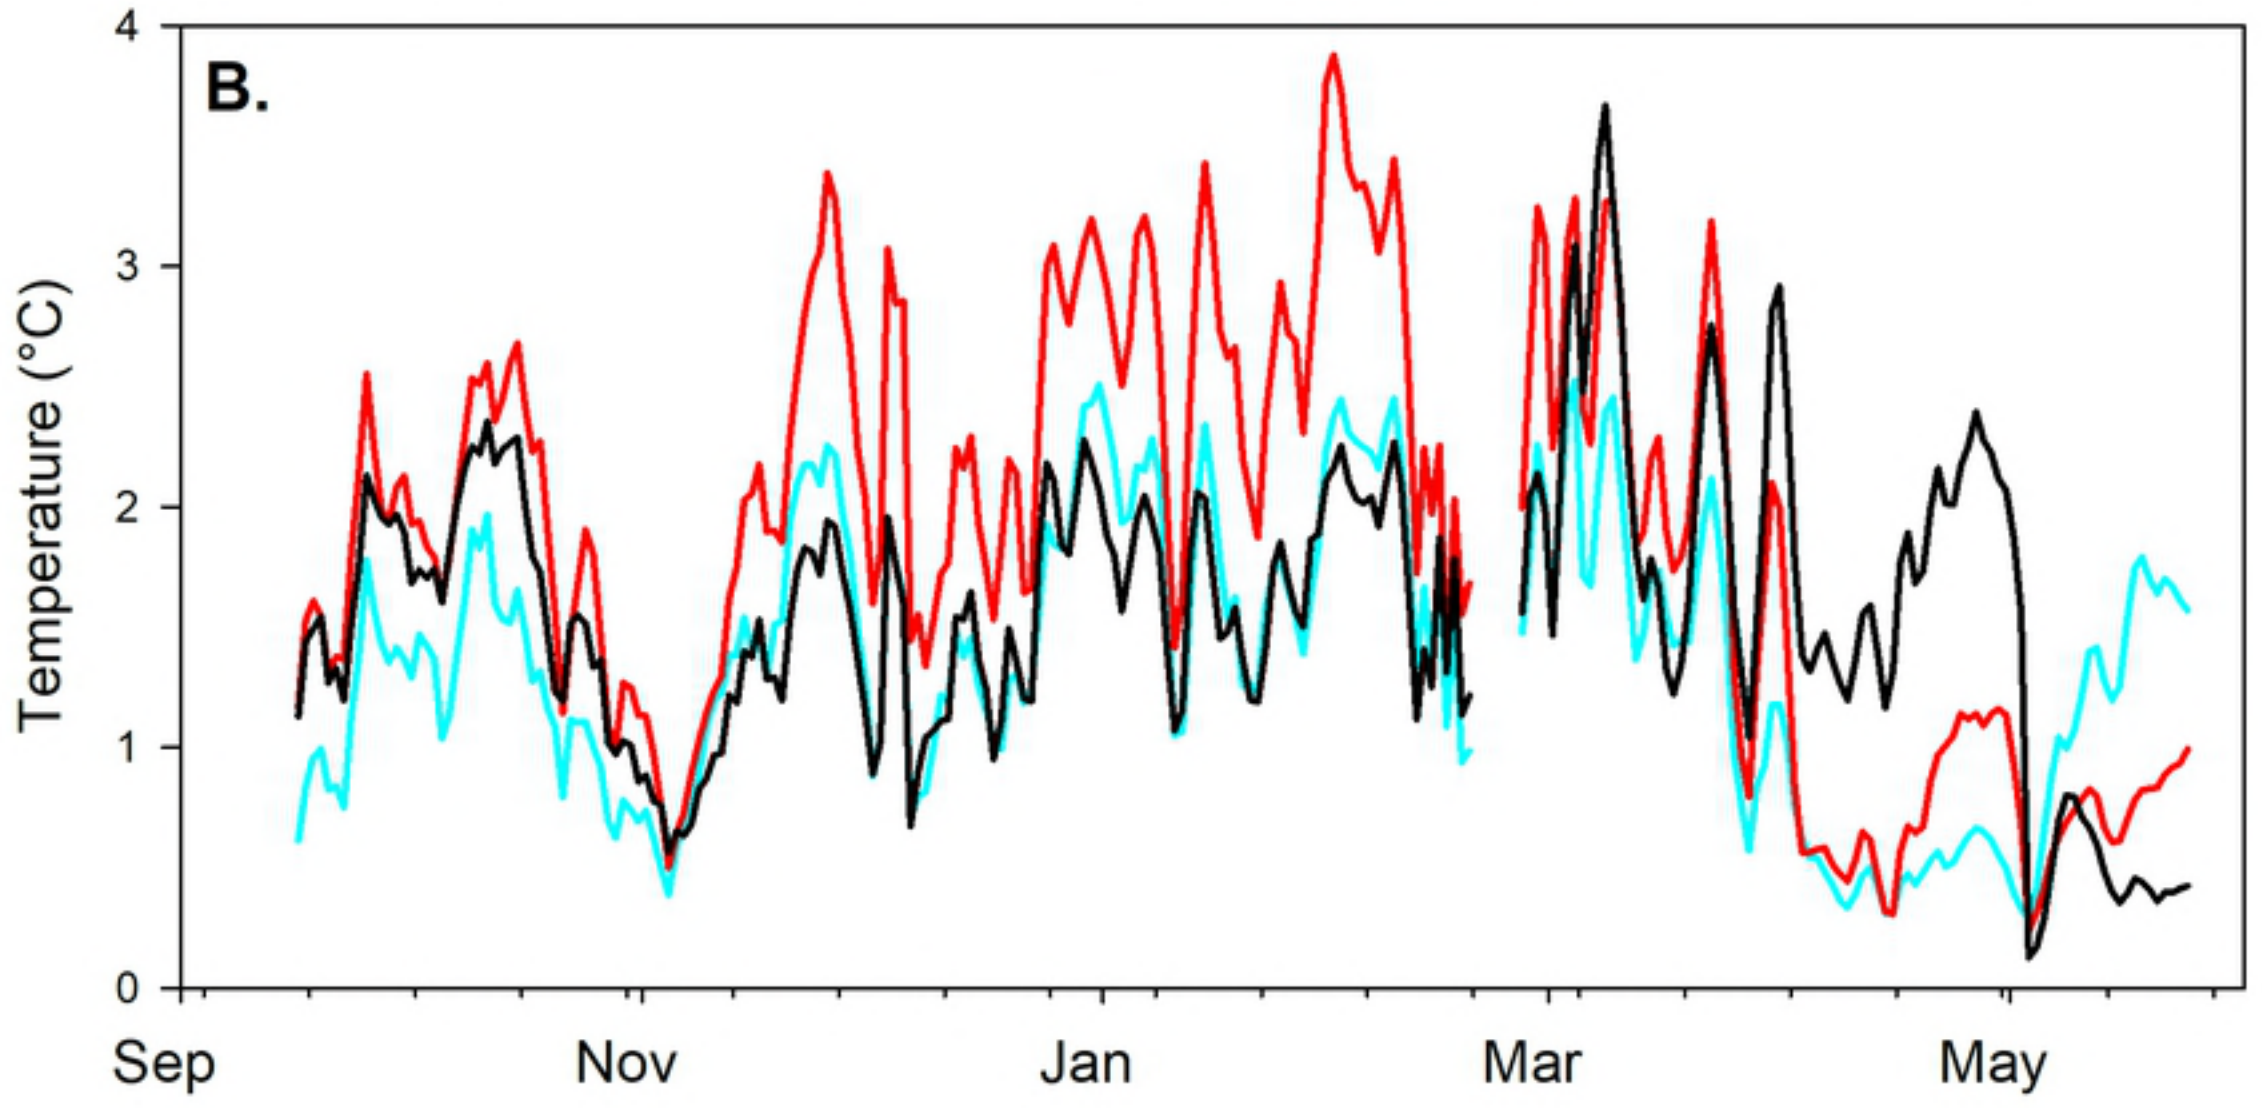

Source: https://www.biorxiv.org/content/10.1101/416354v1.full.pdf
